# Supplementary material for: Metabolic control of cellular immune-competency by odors in Drosophila
Source: eLife. 2020 Dec 29;9:e60376. doi: 10.7554/eLife.60376 (PMC7808736; doi:10.7554/eLife.60376)
Supplement: Figure 1—figure supplement 1—source data 1. [file elife-60376-fig1-figsupp1-data1.xlsx]

## Sheet: Figure 1-figure supplement 1A
			Figure 1-figure supplement 1A
			Orco>/+	Orco>Hid,rpr
		1	34	4
		2	19	10
		3	46	5
		4	23	23
		5	26	11
		6	17	33
		7	14	0
		8	44	29
		9	24	14
		10	26	17
		11	56	0
		12	68	0
		13	45	6
		14	36	0
		15		0
		16		5

## Sheet: Figure 1-figure supplement 1B
		Figure 1-figure supplement 1B
		Orco>/+	Orco>Hid,rpr
	1	173	24
	2	108	9
	3	53	50
	4	80	34
	5	91	12
	6	40	17
	7	68	47
	8	73	16
	9	220	15
	10	124	37
	11	128	16
	12	77	15
	13	136	37
	14	56	24
	15	114	24
	16	220	36
	17	154	25
	18	141	16
	19	124	66
	20	91	15
	21	138	46
	22	146	22
	23	176	24
	24	137	28
	25	108	64
	26	113	26
	27	136	18
	28	70	17
	29	73	15
	30	65	32
	31	123	67
	32	63	36
	33	72	38
	34	86	34
	35		21
	36		18

## Sheet: Figure 1-figure supplement 1C
		Figure 1-figure supplement 1C
		Control (RF)	Control (MOF)	Control (MOF+ food odor)
	1	33	0	14
	2	32	20	0
	3	51	11	10
	4	29	0	0
	5	44	19	34
	6	31	23	22
	7	22	0	22
	8	17	11	34
	9	23	9	22
	10	22	0	19
	11	25	0	22
	12		0	19
	13			31
	14			24

## Sheet: Figure 1-figure supplement 1D
		Figure 1-figure supplement 1D
		Control (RF)	Control (MOF)	Control (MOF+ food odor)
	1	153	6	102
	2	75	8	134
	3	60	12	25
	4	70	15	75
	5	90	11	63
	6	56	13	112
	7	104	5	154
	8	80	4	98
	9	96	16	87
	10	74	15	84
	11	210	25	35
	12	163	13	65
	13	154	11	54
	14	189	17	49
	15	194	19	88
	16	156	31	129
	17	145	35	105
	18	189	21	128
	19	123	12
	20	91	10
	21	82	8
	22	74
	23	44

## Sheet: Figure 1-figure supplement 1E
		Figure 1-figure supplement 1E
		W1118		orco1/orco1		Orco>/+		Orco>Hid, rpr		Or42a>/+		Or42a>Hid		Kurs6>/+		Kurs6>Gad1RNAi
		Lamellocyte counts mm2	Total cell counts mm2	Lamellocyte counts mm2	Total cell counts mm2	Lamellocyte counts mm2	Total cell counts mm2	Lamellocyte counts mm2	Total cell counts mm2	Lamellocyte counts mm2	Total cell counts mm2	Lamellocyte counts mm2	Total cell counts mm2	Lamellocyte counts mm2	Total cell counts mm2	Lamellocyte counts mm2	Total cell counts mm2
	1	129.5	200.5	8	296	66	612	13	476	49.1656	151.789	42	168.568	188	220.5	8	197.5
	2	50	221	26	565	70	464	5	384	30.0456	71.0169	51	89.7466	58	375.5	0	251
	3	60	353.5	18	463	50	486	14	404	32.777	109.647	24	202.905	129	341	0	289
	4	128.5	209	16.5	92	56	574	8	422	50.3362	120.963	23	151.399	109.5	202.5	0	149.5
	5	33.5	192.5	16	218.5	46	624	9	508	50.7264	108.867	8	234.902	134	365.5	3.5	281
	6	47.5	124.5			65	596	5	468					81	255.5	1	295
	7					51	642	0	444
	8					43	610	12	472
	9					50	594	4	398

## Sheet: Figure 1-figure supplement 1F
		Figure 1-figure supplement 1F
		w1118	orco1/orco1	Orco>/+	Orco>Hid, rpr	Or42a>/+	Or42a>Hid	Kurs6>/+	Kurs6>Gad1RNAi	GH146>/+	GH146>ChATRNAi
	1	8	34	55	68	44	22	89	184	7	24
	2	12	49	36	75	27	38	92	141	14	23
	3	35	11	80	73	32	45	102	135	6	21
	4	5	44	99	91	24	42	110	226	25	25
	5	7	8	39	94	13	37	115	195	18	50
	6	9	8	85	95	14	12	230	69	48	15
	7	1	8	60	148	44	13	129	72	115
	8	15	11	105	74	35	9	150	65	26
	9	26	68	23	89		30	117		21
	10	45	47	60	47			182		10
	11	56	56	105	156			260		11
	12		110		157					95
	13		38		64					100
	14		15							17
	15									22
	16									21
	17									23

## Sheet: Figure 1-figure supplement 1G
		Figure 1-figure supplement 1G
		GH146>/+	GH146>ChATRNAi
	1	402	55
	2	710	160
	3	350	50
	4	220	190
	5	495	110
	6	1060	120
	7	310	115
	8	640	108
	9	200	40
	10	180	45
	11	520	95
	12	220	137
	13	310	130
	14	284	94
	15	440	86
	16	530	30
	17	320	110
	18	670	120
	19	350	130
	20	270	94
	21	460	210
	22	310	120
	23	350	220
	24	820	260
	25	550	240
	26	550	250
	27	650	250
	28	100	130
	29	500	150
	30	580	250
	31	750	40
	32	400	310
	33	490	220
	34	760	40
	35	300	100
	36	300	250
	37	520
	38	350
	39	650
	40	150
	41	200
	42	320
	43	150
