# Supplementary material for: Metabolic control of cellular immune-competency by odors in Drosophila
Source: eLife. 2020 Dec 29;9:e60376. doi: 10.7554/eLife.60376 (PMC7808736; doi:10.7554/eLife.60376)
Supplement: Figure 1—figure supplement 2—source data 1. [file elife-60376-fig1-figsupp2-data1.xlsx]

## Sheet: Figure 1-figure supplement 2E
		Figure 1-figure supplement 2E
		Orco>/+ (UI)	Orco>/+ (6HPI)	Orco>Hid (UI)	Orco>Hid (6HPI)
	1	32	16	34	20
	2	21	33	41	39
	3	32	26	24	34
	4	24	19	31	17
	5	37	20	39	21
	6	21	19	12	19
	7	41	43	38	34
	8	13	31	42	28
	9	34	24	13	34
	10	29	11	23	26
	11	27	20	32	33
	12		22	12	34

## Sheet: Figure 1-figure supplement 2J
		Figure 1-figure supplement 2J
		Or42a>/+ (UI)	Or42a>/+ (6HPI)	Or42a>Hid (UI)	Or42a>Hid (6HPI)
	1	21	26	36	45
	2	36	31	32	39
	3	55	35	47	23
	4	30	39	28	43
	5	30	23	18	47
	6	27	50	33	36
	7	40	24	37	27
	8	29	14	30	35
	9	40	21	17
	10	31	49	8
	11	42	22
	12	44	43
	13	30
	14	25
	15	39
	16	27

## Sheet: Figure 1-figure supplement 2O
			Figure 1-figure supplement 2O
			Kurs6>/+ (UI)	Kurs6>/+ (6HPI)	Kurs6>Gad1RNAi (UI)	Kurs6>Gad1RNAi (6HPI)
		1	25	21	16	24
		2	41	30	23	36
		3	34	27	25	35
		4	24	25	37	19
		5	37	14	28	18
		6	28	27	41	25
		7	13	15	25	41
		8	30	33	23	30
		9	33	11	27	43
		10	20	18	20	19
		11	21		15	40
		12	29		21	27
		13	45		20	27
		14	14		19	31
		15	14		18	26
		16	33		46	22
		17	17		31	19
		18	19		19	20
		19				32
		20				13
		21				19
		22				16

## Sheet: Figure 1-figure supplement 2T
		Figure 1-figure supplement 2T
		Or49a>/+ (UI)	Or49a>/+ (6HPI)	Or49a>Hid (UI)	Or49a>Hid (6HPI)
	1	29	48	36	33
	2	29	32	29	23
	3	31	23	22	24
	4	21	18	26	18
	5	25	48	41	33
	6	38	20	53	59
	7	48	18	26	18
	8	44	29	20	35
	9	40		25	29
	10	11		41
	11			37
