# Supplementary material for: Metabolic control of cellular immune-competency by odors in Drosophila
Source: eLife. 2020 Dec 29;9:e60376. doi: 10.7554/eLife.60376 (PMC7808736; doi:10.7554/eLife.60376)
Supplement: Figure 1—source data 1. [file elife-60376-fig1-data1.xlsx]

## Sheet: Figure 1C
			Figure 1C
			Cont	orco1/orco1
		1	25	4
		2	13	11
		3	27	15
		4	11	6
		5	49	7
		6	50	11
		7	65	15
		8	32	10
		9	31	1
		10	40	27
		11	37	34
		12	36	3
		13	32	1
		14	65	2
		15	32	3
		16	28	12
		17	30	17
		18	48	4
		19		12
		20		7

## Sheet: Figure 1D
				Figure 1D
				Cont	orco1/orco1
			1	537	180
			2	652	147
			3	436	130
			4	123	40
			5	230	70
			6	300	10
			7	150	11
			8	300	130
			9	350	198
			10	270	89
			11	170	70
			12	200	57
			13	300	470
			14	350	40
			15	734	36
			16	820	58
			17	430	18
			18	560	120
			19	1720
			20	420
			21	1520
			22	1900
			23	680

## Sheet: Figure 1F
			Figure 1F
			Or42a>/+	Or42a>Hid
		1	78	6
		2	63	13
		3	112	11
		4	98	29
		5	105	44
		6	119	53
		7	33	34
		8	24	29
		9	47	19
		10	34	15
		11	57	22
		12	87	30
		13	45	66
		14	48	47
		15	64	2
		16	71	21
		17	41	27
		18	56	16
		19	23	14
		20	17	21
		21	102	22
		22	63	16
		23	35	19
		24	88	24

## Sheet: Figure 1G
				Figure 1G
				Or42a>/+	Or42a>Hid
			1	42	341
			2	1408	221
			3	1567	820
			4	1105	797
			5	623	970
			6	981	954
			7	1810	610
			8	660	324
			9	828	187
			10	1158	205
			11	124	342
			12	627	80
			13	1254	45
			14	1325	671
			15	508	217
			16	1083	189
			17	186	440
			18	505	324
			19	810	101
			20		504

## Sheet: Figure 1I
				Figure 1I
				Kurs6>/+	Kurs6>Gad1RNAi
			1	25	5
			2	13	0
			3	27	12
			4	11	18
			5	49	15
			6	50	4
			7	65	0
			8	32	0
			9	31	0
			10	40	4
			11	37	10
			12	36	14
			13	32	6
			14	65	0
			15	32	6
			16	28	0
			17	30	12
			18	48	1
			19		2
			20		0
			21		21
			22		0

## Sheet: Figure 1J
				Figure 1J
				Kurs6>/+	Kurs6>Gad1RNAi
			1	537	6
			2	652	35
			3	436	120
			4	405	165
			5	294	25
			6	652	12
			7	633	24
			8	304	68
			9	348	9
			10	308	100
			11	496	7
			12	341	11
			13	259	20
			14	331	4
			15	460	3
			16	296	4
			17	1723	24
			18	1690	21
			19	1628	0
			20	1515	4
			21	1264	5
			22	360	7
			23		4
			24		74
			25		44
