# Supplementary material for: Metabolic control of cellular immune-competency by odors in Drosophila
Source: eLife. 2020 Dec 29;9:e60376. doi: 10.7554/eLife.60376 (PMC7808736; doi:10.7554/eLife.60376)
Supplement: Figure 2—figure supplement 1—source data 1. [file elife-60376-fig2-figsupp1-data1.xlsx]

## Sheet: Figure 2-figure supplement 2I
	Figure 2-figure supplement 1I
	dome-MESO>/+ L2 (UI)	dome-MESO>/+ L3 (UI)	dome-MESO>/+ (6HPI)	dome-MESO>/+ (24HPI)
1	85.7792	84.2872	91.9798	89.6724
2	83.7747	95.2348	97.2495	83.7115
3	88.0253	75.2326	84.2727	70.5698
4	83.547	72.2563	89.7351	74.4427
5	81.3658	91.4749	90.9306	78.7765
6	91.0717	93.0198	85.0858	94.0217
7	87.2784	86.561	91.3297	65.1436
8	87.6631	76.6147	85.3135	82.2476
9		83.4392	87.5684
10		68.0518	98.4148
11		93.8692	89.412
12		91.3097	91.7188
13		83.8894	94.3724
14			81.3459
15			96.5812
16			88.3107
17			77.5438

## Sheet: Figure 2-figure supplement 1J
		Figure 2-figure supplement 1J
		Tep4>/+ L2 (UI)	Tep4>/+ L3 (UI)	Tep4>/+ (6HPI)	Tep4>/+ (24HPI)
	1	43.6686	45.2639	93.4894	44.8358
	2	57.7581	63.3029	56.6349	34.3792
	3	73.1254	68.2955	67.8049	32.5705
	4	64.7101	49.4708	37.3248	49.6163
	5	81.9326	57.5405	42.6678	33.1036
	6	52.7688	41.7263	54.0515	37.6052
	7	57.8192	47.7365	64.4311	68.8377
	8	50.4901		53.5238	55.3506
	9	62.5325		61.2199	54.0431
	10	80.2928		23.3454	62.4414
	11	80.6202		31.8453	58.3162
	12	66.974		44.7052	52.7195
	13	73.5273		64.2981	38.8886
	14	82.4049		80.5532	50.7077
	15	49.9652		76.1711	59.0245
	16	32.5384		82.6894	64.8464
	17	58.9269		74.8639	32.6013
	18	43.5402		71.7652	29.9641
	19	59.3126		63.1581
	20	45.2938		65.4131
	21	38.9341		53.5964
	22	45.227		42.4228
	23	69.1909		30.0124
	24			54.106
	25			76.6365
	26			45.2574
	27			38.5425
	28			31.2787
	29			35.9832
	30			66.4355
	31			63.553

## Sheet: Figure 2-figure supplement 1K
		Figure 2-figure supplement 1K
		dome-MESO>/+	dome-MESO>GABABR1RNAi
	1	7	30
	2	4	40
	3	2	9
	4	6	2
	5	10	58
	6	11	57
	7	15	10
	8	5	15
	9	5	19
	10	13	55
	11	3	30
	12	6	20
	13	9	34
	14	4	23
	15	80	17
	16	24	48
	17	20	31
	18	44	62
	19	19	28
	20	9	39
	21	15	50
	22	17	6
	23	18	1
	24	27	50
	25	11
	26	20
	27	6
	28	5
	29	2
	30	65
	31	23

## Sheet: Figure 2-figure supplement 1L
		Figure 2-figure supplement 1L
		dome-MESO>/+	dome-MESO>GABABR1RNAi
	1	1150	755
	2	400	1440
	3	1508	341
	4	460	530
	5	405	480
	6	550	920
	7	336	442
	8	150	93
	9	493	55
	10	906	75
	11	123	66
	12	234	133
	13	170	190
	14	134	130
	15	120	123
	16	115	1080
	17	135	1640
	18	360	740
	19	85	1035
	20	208	426
	21	79	658
	22	295	667
	23	50	650
	24	160	150
	25	182
	26	463
	27	293
	28	190
	29	184
	30	189

## Sheet: Figure 2-figure supplement 1M
		Figure 2-figure supplement 1M
		dome-MESO>/+		dome-MESO>GABABR1RNAi
		Lamellocyte counts mm2	Total cell counts mm2	Lamellocyte counts mm2	Total cell counts mm2
	1	65.1639	503.752	35.8987	487.753
	2	38.2399	369.522	45.2635	313.333
	3	40.9713	416.737	20.2905	204.076
	4	42.5321	202.515	14.8277	225.147
	5	37.8497	314.503	26.924	204.466

## Sheet: Figure 2-figure supplement 1N
		Figure 2-figure supplement 1N
		Tep4>/+	Tep4>GABABR1RNAi
	1	17	21
	2	10	43
	3	25	31
	4	43	17
	5	14	18
	6	25	30
	7	15	22
	8	15	23
	9	23	11
	10	36	20
	11		23

## Sheet: Figure 2-figure supplement 1O
		Figure 2-figure supplement 1O
		Tep4>/+	Tep4>GABABR1RNAi
	1	150	1150
	2	630	1750
	3	1820	1380
	4	1550	1100
	5	710	350
	6	790	1600
	7	310	1100
	8	1160	1940
	9	1370	1700
	10	1920	280
	11	620	400
	12	750	900
	13	630	650
	14	490	750
	15	1310	450
	16	620	350
	17	780	280
	18	520	390
	19	260	790
	20	950	350
	21	1900	2000
	22	1700	1200
	23	250	680
	24	2100	1600
	25	1300	600
	26	350	250
	27	850	680
	28	1400	1400
	29	370	950
	30	280	1500
	31	350
	32	1450
	33	1310

## Sheet: Figure 2-figure supplement 1R
		Figure 2-figure supplement 1R
		dome-MESO>/+ (UI)	fold change	dome-MESO>/+ (6HPI)	fold change
	1	1327.59	0.612585	2808.56	1.29594
	2	1558.53	0.719147	2618.27	1.20814
	3	2294.81	1.05889	2872.49	1.32544
	4	2757.61	1.27243	791.469	0.365204
	5	2021.05	0.932564	953.12	0.439794
	6	1859.08	0.85783	2881.74	1.32971
	7	2524.36	1.16481	3060.2	1.41205
	8	2515.19	1.16057	3211.99	1.4821
	9	1607.21	0.741607	3255.55	1.5022
	10	1682.22	0.776222	2469.26	1.13938
	11	2852.68	1.3163	2376.39	1.09653
	12	3005.99	1.38704	2929.19	1.3516
	13			3111.23	1.4356
