# Supplementary material for: Metabolic control of cellular immune-competency by odors in Drosophila
Source: eLife. 2020 Dec 29;9:e60376. doi: 10.7554/eLife.60376 (PMC7808736; doi:10.7554/eLife.60376)
Supplement: Figure 2—figure supplement 2—source data 1. [file elife-60376-fig2-figsupp2-data1.xlsx]

## Sheet: Figure 2-figure supplement 2A
		Figure 2-figure supplement 2A
		dome-MESO>/+	dome-MESO>GatRNAi BL	dome-MESO>GatRNAi GD	dome-MESO>SsadhRNAi KK	dome-MESO>SsadhRNAi GD
	1	57	4	43	6	7
	2	80	6	100	6	6
	3	8	60	34	2	26
	4	32	2	115	15	9
	5	39	23	20	3	22
	6	43	2	86	0	41
	7	21	31	51	23	20
	8	42	3	16	3	53
	9	24	1	3	0	0
	10	0	24	133	58	40
	11	132	97	50	2	0
	12	114	0	13	0	14
	13	170	9	36	28	2
	14	28	29	75		0
	15	137	5	61		2
	16	75		60		1
	17	32		2		0
	18	0		41		0
	19	79		49
	20	42		17
	21	39		120
	22	0		33
	23	3		127
	24	57		13
	25	53		42
	26	4		111
	27	2		0
	28	54		67
	29	43		61
	30	149		0
	31	0		25
	32	8		42
	33	180		64
	34	24		1
	35	8		47
	36	27
	37	7
	38	69
	39	12

## Sheet: Figure 2-figure supplement 2B
		Figure 2-figure supplement 2B
		dome-MESO>/+	dome-MESO>GatRNAi BL	dome-MESO>GatRNAi GD	dome-MESO>SsadhRNAi KK	dome-MESO>SsadhRNAi BL
	1	620	5	179	120	150
	2	220	76	124	14	450
	3	320	19	94	42	45
	4	360	98	22	34	270
	5	100	7	118	6	250
	6	20	98	25	102	80
	7	750	52	57	109	50
	8	450	49	8	49	20
	9	60	37	56	135	650
	10	140	8	67	94	300
	11	550	67	77	50	560
	12	380	127	267	70	400
	13	690	132	48	120	750
	14	60	55	110	20	300
	15	350	7	18	90	40
	16	840			100	610
	17	250			105	410
	18	370			63	750
	19	790			90	418
	20	30			110	230
	21	105			410	145
	22	780			37	40
	23	150				240
	24	70				130
	25	316				15
	26	610				90
	27	40				190
	28	370				230
	29	1200				130
	30	220				160
	31	550				74
	32	170				175
	33	290				50
	34	90				110
	35	40				50
	36	220				220
	37	120
	38	137
	39	139
	40	127
	41	23
	42	298
	43	72
	44	520
	45	70
	46	121
	47	54
	48	422
	49	269
	50	77
	51	62
	52	55
	53	197
	54	132
	55	81
	56	165
	57	120

## Sheet: Figure 2-figure supplement 2I
		Figure 2-figure supplement 2I
		dome-MESO>/+		dome-MESO>GatRNAi		dome-MESO>Gat		dome-MESO>SsadhRNAi
		Lamellocyte counts mm2	Total cell counts mm2	Lamellocyte counts mm2	Total cell counts mm2	Lamellocyte counts mm2	Total cell counts mm2	Lamellocyte counts mm2	Total cell counts mm2
	1	65.1639	503.752	23	660.223	81.5524	614.179	7.91687	428.995
	2	38.2399	369.522	8	354.304	128	318.406	9.40129	276.101
	3	40.9713	416.737	11	293.042	65.1639	417	32.1623	230.084
	4	42.5321	202.515	29	630.178	67.5051	422.59	9.40129	302.82
	5	37.8497	314.503	5	304.358	160.7	478	9.89609	469.075

## Sheet: Figure 2-figure supplement 2J
		Figure 2-figure supplement 2J
		Tep4>/+	Tep4>GatRNAi	Tep4>SsadhRNAi
	1	8	34	4
	2	20	27	2
	3	32	4	90
	4	12	3	60
	5	4	26	95
	6	110	12	60
	7	140	15	0
	8	180	13	95
	9	45	4	130
	10	48	23	5
	11	45	10	50
	12	20	25	30
	13	9	28	5
	14	40	16	30
	15	13	35	26
	16	0	44	0
	17	0		0
	18	150		10
	19	180		35
	20	45		20
	21	50		5
	22	20		35
	23	0		7
	24	30		20
	25	10		50
	26	95		30
	27	113		107
	28	111		51
	29	72		39
	30	90		29
	31	49		16
	32	26		151
	33	20		35
	34	18		67
	35	19		101
	36	41		82
	37	17		37
	38	3		8
	39	6		30
	40	4		6
	41	120		3
	42	170		76
	43	63		58
	44	150		95
	45	220		4
	46	40		0
	47	30		3
	48	10		0
	49	6		20
	50	110		10
	51	130		0
	52	48		0
	53	120		4
	54	50		2
	55			9
	56			5
	57			4
	58			0
	59			3
	60			0
	61			59
	62			110
	63			18
	64			20
	65			60
	66			50
	67			0
	68			2

## Sheet: Figure 2-figure supplement 2K
		Figure 2-figure supplement 2K
		Tep4>/+	Tep4>GatRNAi	Tep4>SsadhRNAi
	1	150	330	284
	2	630	110	248
	3	1820	190	320
	4	1550	230	260
	5	710	170	260
	6	790	310	670
	7	310	190	450
	8	1160	160	520
	9	1370	250	640
	10	1920	390	720
	11	620	150	640
	12	750	550	510
	13	630	510	145
	14	490	710	390
	15	1310	160	750
	16	620	350	550
	17	780		250
	18	520		350
	19	260		550
	20	950		460
	21	1900		110
	22	1700		410
	23	250		310
	24	2100		550
	25	1300		210
	26	350		300
	27	850		190
	28	1400		350
	29	370		120
	30	280		450
	31	350		510
	32	1450		150
	33	1310		250
	34			300

## Sheet: Figure 2-figure supplement 2M
		Figure 2-figure supplement 2M
		Gene	CT value	Relative fold change	SD
		rp49	18.046
		rp49	17.946
		rp49	17.879	1	0.00468016
		Gat	30.698
		Gat	31.834
		Gat	31.952	0.57016	0.0385617
		Ssadh	25.206
		Ssadh	25.134
		Ssadh	25.709	0.708372	0.0174454
