# Supplementary material for: Metabolic control of cellular immune-competency by odors in Drosophila
Source: eLife. 2020 Dec 29;9:e60376. doi: 10.7554/eLife.60376 (PMC7808736; doi:10.7554/eLife.60376)
Supplement: Figure 2—figure supplement 3—source data 1. [file elife-60376-fig2-figsupp3-data1.xlsx]

## Sheet: Figure 2-figure supplement 3P
		Figure 2-figure supplement 3P
		dome-MESO>/+
		%Pxn+ area	%Dome+ %Pxn+ area	%Dome+ area
	1	53.5351	3.00873	43.4562
	2	30.6925	5.59241	63.7151
	3	29.7001	0.52406	69.7758
	4	31.1343	1.91931	66.9464
	5	33.8605	2.73698	63.4025
	6	32.8087	16.202	50.9892
	7	24.8628	1.7304	73.4068
	8	20.0702	2.44659	77.4832
		dome-MESO>Gat RNAi
		%Pxn+ area	%Dome+ %Pxn+ area	%Dome+ area
	1	36.8773	17.2095	45.9132
	2	32.383	14.216	53.4011
	3	38.0913	18.3443	43.5643
	4	32.4505	20.1222	47.4273
	5	30.5858	13.4308	55.9834
	6	26.0676	21.4186	52.5138
	7	34.6139	13.773	51.6131
		dome-MESO>SsadhRNAi
		%Pxn+ area	%Dome+ %Pxn+ area	%Dome+ area
	1	35.7732	21.3855	42.8412
	2	36.827	40.8772	22.2958
	3	47.2703	24.0539	28.6759
	4	42.0539	31.4724	26.4737
	5	40.1261	26.8339	33.0401
	6	34.7739	7.50198	57.7241
	7	36.5842	33.1826	30.2332
	8	37.584	20.5749	41.8412
	9	25.8349	22.2427	51.9224
	10	19.2397	45.6484	35.1118
	11	35.9206	29.9914	34.088

## Sheet: Figure 2-figure supplement 3Q
		Figure 2-figure supplement 3Q
		dome-MESO>/+	dome-MESO>GatRNAi	dome-MESO>SsadhRNAi	dome-MESO>simaRNAi
	1	71	75	57	29
	2	67	30	60	37
	3	22	42	62	13
	4	8	20	36	4
	5	46	4	30	15
	6	67	54	32	38
	7	88	39	34	63
	8	29	54	62	29
	9	19	21	37	16
	10	19	15	23	38
	11	30	14	65	36
	12	12	10	9	54
	13	31	24	35	25
	14	61	27		49
	15	41	45		27
	16	44	92		47
	17	46	103		25
	18	27	35
	19	101	37
	20	73	28
	21	78	38
	22	153	60
	23	76	19
	24	40	60
	25	53	59
	26	30	63
	27	65	17
	28	22	13
	29	70	48
	30	75	53
	31	74	62
	32	97	55
	33	83
	34	79
	35	80
	36	30
	37	53
	38	63
	39	38
	40	29
	41	58
	42	37
	43	38
	44	40
	45	24
	46	27
	47	43

## Sheet: Figure 2-figure supplement 2R
		Figure 2-figure supplement 2R
		domeMESO>/+(UI)	domeMESO>/+(6HPI)	domeMESO>GatRNAi(UI)	domeMESO>GatRNAi(6HPI)	domeMESO>SsadhtRNAi(UI)	domeMESO>SsadhRNAi(6HPI)
	1	22	14	15	13	27	21
	2	32	24	22	12	19	15
	3	27	15	20	17	14	47
	4	13	29	19	18	19	36
	5	27	15	27	11	17	34
	6	21	16	27	15	18	28
	7	20	21	13	19	17	18
	8	15	26	17	20	22	29
	9	16	12	24		21	16
	10	23	24	20		9	27
	11	27	18	12		15	19
	12	13	17			8	25
	13	18	27			23	23
	14	16	12			12	23
	15	22	18			28	8
	16	18	13				29
	17	21	12				20
	18		25				15
	19		12				30
	20		20				34
	21						18
