# Supplementary material for: Metabolic control of cellular immune-competency by odors in Drosophila
Source: eLife. 2020 Dec 29;9:e60376. doi: 10.7554/eLife.60376 (PMC7808736; doi:10.7554/eLife.60376)
Supplement: Figure 2—figure supplement 4—source data 1. [file elife-60376-fig2-figsupp4-data1.xlsx]

## Sheet: Figure 2-figure supplement 4Q
		Figure 2-figure supplement 4Q
		%Pxn+ area
		dome-MESO>/+ (RF)	dome-MESO>/+ (SF)
	1	34.6137	17.6202
	2	16.771	19.6874
	3	13.3537	18.6227
	4	15.7829	18.8102
	5	13.5811	17.1889
	6	20.6876	19.4512
	7	13.2646	13.8045
	8	25.1501	18.3359
	9	19.8207	14.88
	10	22.4977	24.6562
	11	14.551	32.1435
	12	30.7684
	13	22.6482
	14	12.7362
	15	32.109

## Sheet: Figure 2-figure supplement 4I
		Figure 2-figure supplement 4I
		dome-MESO>/+	dome-MESO>GatRNAi	dome-MESO>GatRNAi(SF)	dome-MESO>SsadhRNAi	dome-MESO>SsadhRNAi(SF)
	1	11	15	7	1	13
	2	16	12	9	2	2
	3	11	0	3	1	14
	4	12	0	4	0	2
	5	13	7	4	2	22
	6	6	0	19	0	17
	7	12	1	0	0	15
	8	10	0	32	0	16
	9	3	10	28	0	25
	10	11	11	3	0	2
	11	7	4	4	5	36
	12	7	2	70	0	23
	13	2	4	85	8	35
	14	21	0	4	2	41
	15	25	14	3	0	4
	16	0	3	55	0	13
	17	4	0	0	0	0
	18	3	0	3	45	0
	19	0	6	40	40	3
	20	0	0	28	35	54
	21	8	0	38	17	11
	22	2	5	45	20	0
	23	13	0	14	25	3
	24	31	0	11	0	48
	25	70	2	8	0	34
	26	65	0	4	2	0
	27	90	0	42	0	0
	28	85	16	20	0	18
	29	0	20	45	10	4
	30	0	25	18	7	26
	31	120	20	4	3	25
	32	140	45	7	18	15
	33	2	25	10	0	16
	34	4	35	0	0	30
	35	5	15	0	2	45
	36	16	5	34	0	20
	37	0	8	5	4
	38	11	10	3	0
	39	6	4	0	35
	40	10	0	0	5
	41	3	80	0	0
	42	3	40	0	0
	43	0	35	1	40
	44	10	40	20	28
	45	5	15	10	0
	46	25	3	35	0
	47	13	13	50	2
	48	4	17	20	0
	49	0	20	10	0
	50	80	7	35	0
	51	10	4	40	0
	52	37	0	6	13
	53	30	0	7	4
	54	0	20		20
	55	0	15		17
	56	50	0		0
	57	90	0		0
	58	10	0		19
	59	12	0		0
	60	45	0		4
	61	60			0
	62	0			0
	63	4			0
	64	4
	65	17
	66	18
	67	25
	68	75
	69	85
	70	2
	71	0
	72	6
	73	10
	74	4
	75	3
	76	20
	77	30
	78	10
	79	5
	80	7
	81	0
	82	15
	83	30
	84	17
	85	5
	86	50
	87	150
	88	120
	89	4
	90	0
	91	15
	92	20
	93	9
	94	15
	95	7
	96	0
	97	150
	98	170
	99	10
	100	7
	101	10
	102	15
	103	95
	104	70
	105	0
	106	20
	107	6
	108	50
	109	45
	110	30
	111	2
	112	4
	113	25
	114	28
	115	5

## Sheet: Figure 2-figure supplement 4J
		Figure 2-figure supplement 4J
		dome-MESO>/+	dome-MESO>GatRNAi	dome-MESO>GatRNAi(SF)	dome-MESO>SsadhRNAi	dome-MESO>SsadhRNAi(SF)
	1	370	44	58	120	150
	2	260	8	120	14	256
	3	310	30	100	42	110
	4	400	35	59	34	323
	5	710	90	40	6	202
	6	310	154	89	102	205
	7	260	45	200	109	260
	8	340	23	47	49	160
	9	190	33	219	135	450
	10	170	6	402	94	110
	11	120	3	258	50	150
	12	230	24	75	70	200
	13	450	8		120	110
	14	470	7		20
	15	430	28		90
	16	400	30		100
	17	123	18		105
	18	234	42		63
	19	170	30		90
	20	134	80		110
	21	120	14		410
	22	115	15		37
	23	135	5
	24	360	11
	25	85	15
	26	208	20
	27	79
	28	295
	29	50
	30	160
	31	182
	32	123
	33	234
	34	170
	35	134
	36	120
	37	115
	38	135
	39	360
	40	85
	41	208
	42	79
	43	295
	44	50
	45	160
	46	182
