# Supplementary material for: Metabolic control of cellular immune-competency by odors in Drosophila
Source: eLife. 2020 Dec 29;9:e60376. doi: 10.7554/eLife.60376 (PMC7808736; doi:10.7554/eLife.60376)
Supplement: Figure 2—figure supplement 5—source data 1. [file elife-60376-fig2-figsupp5-data1.xlsx]

## Sheet: Figure 2-figure supplement 5A
		Figure 2-figure supplement 5A
		dome-MESO>/+	dome-MESO>a-KDHRNAi	dome-MESO>skapRNAi	dome-MESO>SdhARNAi
	1	45	42	37	54
	2	34	17	42	75
	3	35	49	50	64
	4	79	52	39	30
	5	93	37	57	33
	6	42	82	45	74
	7	24	44	52	5
	8	80	46		90
	9	18	48		79
	10	20	43		37
	11	15	36		70
	12	40	44		4
	13	16	40		90
	14	10
	15	11

## Sheet: Figure 2-figure supplement 5B
		Figure 2-figure supplement 5B
		dome-MESO>/+	dome-MESO>a-KDHRNAi	dome-MESO>skapRNAi	dome-MESO>SdhARNAi
	1	1150	132	220	340
	2	400	271	324	250
	3	1508	160	255	210
	4	460	350	170	380
	5	405	50	510	390
	6	550	180	408	387
	7	336	460	490	170
	8	150	40	200	380
	9	493	130	150	240
	10	906	170	250	620
	11	123	860	290	450
	12	234	175	210	420
	13	170	380	300	950
	14	134	136	550	670
	15	120	200	50	200
	16	115	96		350
	17	135	610		450
	18	360	310		750
	19	85	190		50
	20	208	145		1100
	21	79	120		270
	22	295	200		370
	23	50	150		120
	24	160	250		150
	25	182	60		310
	26	463			200
	27	293			970
	28	190			100
	29	184			200
	30	189			490
	31	1053			420
	32	405			380
	33	810			610
	34	1380			910
	35	508			200
	36				150
	37				670
	38				720

## Sheet: Figure 2-figure supplement 5C
		Figure 2-figure supplement 5C
		dome-MESO>/+		dome-MESO>a-KDHRNAi		dome-MESO>skapRNAi		dome-MESO>SdhARNAi
		Lamellocyte counts mm2	Total cell counts mm2	Lamellocyte counts mm2	Total cell counts mm2	Lamellocyte counts mm2	Total cell counts mm2	Lamellocyte counts mm2	Total cell counts mm2
	1	65.1639	503.752	63.2129	561.502	60.0912	431.564	92.8683	513.117
	2	38.2399	369.522	53.4578	404.25	51.1166	633.689	81.5524	503.752
	3	40.9713	416.737	20.2905	381.228	69.4561	339.867	65.1639	444.051
	4	42.5321	202.515	69.8463	323.868	116.671	408.542	117.061	819.036
	5	37.8497	314.503	23.022	377.716	63.9933	841.667	88.576	605.205

## Sheet: Figure 2-figure supplement 5E
		Figure 2-figure supplement 5E
		Gene	CT value	Relative fold change	SD
		rp49	18.046
		rp49	17.946
		rp49	17.879	1	0.00468016
		Idh	23.98
		Idh	23.964
		Idh	24.013	0.748655	0.00124457
		Pdhk	25.503
		Pdhk	25.571
		Pdhk	25.538	0.703167	0.00169374
		Mdh	21.993
		Mdh	22.19
		αKDH	30.654
		αKDH	30.236
		αKDH	30.966	0.586472	0.0182442
		skap	26.855
		skap	26.265
		skap	26.367	0.677733	0.017561
		Gdh	24.298
		Gdh	24.1
		Gdh	24.248	0.742055	0.00573384
		Sdh	24.829
		Sdh	23.908
		Sdh	24.867	0.731903	0.0302412
