# Supplementary material for: Metabolic control of cellular immune-competency by odors in Drosophila
Source: eLife. 2020 Dec 29;9:e60376. doi: 10.7554/eLife.60376 (PMC7808736; doi:10.7554/eLife.60376)
Supplement: Figure 2—source data 1. [file elife-60376-fig2-data1.xlsx]

## Sheet: 2D
		Figure 2D
		Control (UI)	Fold change_UI	Control (6HPI)	Fold change_6HPI
	1	247.203	0.270889	1937.17	2.12278
	2	460.305	0.504407	1850.2	2.02747
	3	651.322	0.713726	1269.62	1.39127
	4	635.453	0.696337	1717.8	1.88238
	5	763.293	0.836425	2064.58	2.2624
	6	905.171	0.991897	1992.35	2.18324
	7	1107.81	1.21395	2190.09	2.39993
	8	1145.42	1.25517	1992.16	2.18303
	9	1304.93	1.42996	1833.15	2.00879
	10	1365.18	1.49598	1782.17	1.95293
	11	1192.05	1.30626	1179.46	1.29247
	12	796.02	0.872288	1298.84	1.42328
	13	922.008	1.01035	1640.8	1.79801
	14	1035.45	1.13466	1785.85	1.95696
	15	1156.85	1.26769	1419.28	1.55526
	16			1403.15	1.53759

## Sheet: 2G
		Figure 2G
		dome-MESO>/+ (UI)	Fold change_dome-MESO>/+ (UI)	dome-MESO>/+ (6HPI)	Fold change_dome-MESO>/+ (6HPI)
	1	784.549	0.489787	3567.5	2.22716
	2	886.006	0.553126	3641.44	2.27332
	3	1588.72	0.991822	3545.82	2.21363
	4	1208.95	0.75474	3676.36	2.29512
	5	1942.8	1.21288	3563.68	2.22477
	6	2180.81	1.36146	3531.29	2.20455
	7	1671.07	1.04323	3777.85	2.35848
	8	1615.53	1.00856	3166.83	1.97702
	9	2537.9	1.58439	3506.39	2.18901
	10			2699.55	1.6853
	11			3029.67	1.8914

## Sheet: 2J
		Figure 2J
		dome-MESO>/+	Fold change_dome-MESO>/+ (UI)	dome-MESO>GatRNAi	Fold change_dome-MESO>GatRNAi(UI)
	1	1040.09	0.800866	575.667	0.443263
	2	1239.87	0.954702	715.196	0.5507
	3	948.773	0.730555	1772.5	1.36483
	4	2473.06	1.90426	1404.1	1.08116
	5	766.39	0.59012	472.781	0.364042
	6	1201.78	0.925367	452.555	0.348467
	7	1201.83	0.925407	473.691	0.364742
	8	1071.02	0.824681	325.889	0.250935
	9	1523.97	1.17346	121.984	0.093928
	10	1520.25	1.17059	93.2805	0.0718259

## Sheet: 2K
		Figure 2K
		dome-MESO>/+	Fold change_dome-MESO>/+ (6HPI)	dome-MESO>GatRNAi	Fold change_dome-MESO>GatRNAi(6HPI)
	1	1622.69	0.591468	3229.21	1.17704
	2	2734.87	0.996853	3021.19	1.10122
	3	2919.39	1.06411	1046.94	0.381606
	4	3457.53	1.26026	2608.61	0.950834
	5	3117.73	1.13641	2358.51	0.859671
	6	3426.32	1.24889	2414.96	0.880248
	7	2461.61	0.897251	2034.46	0.741555
	8	3353.06	1.22218	1093.22	0.398478
	9	3574.37	1.30285	1073.55	0.391305
	10	1852.38	0.67519	776.609	0.283072
	11	1658.54	0.604535	1630.59	0.594346

## Sheet: 2P
		Figure 2P
		dome-MESO>/+	dome-MESO>GatRNAi	dome-MESO>Gat	dome-MESO>SsadhRNAi
	1	12	0	65	0
	2	16	0	19	0
	3	2	1	52	0
	4	11	3	45	0
	5	5	5	30	5
	6	5	4	22	0
	7	10	3	23	8
	8	25	0	90	2
	9	5	3	160	0
	10	7	0	95	0
	11	7	0	33	0
	12	33	15	35	45
	13	24	8	45	40
	14	2	26	20	35
	15	10	7	8	17
	16	11	24	14	20
	17	28	4	98	25
	18	33	10	49	0
	19	2	12	25	0
	20	0	5	28	2
	21	5	7	15	0
	22	7	8	20	0
	23	2	2	36	10
	24	25	0	49	7
	25	24	30	13	3
	26	20	0	2	18
	27	0	0	200	0
	28	16	4	25	0
	29	8	0	27	2
	30	70	14	35	0
	31	72	3	10	4
	32	1	0	70	0
	33	0	0	65	35
	34	1	6	55	5
	35	0	0	26	0
	36	7	0	30	0
	37	2	5	40	40
	38	4	0	85	28
	39	4	0	40	0
	40	20	2	45	0
	41	26	0	55	2
	42	24	0	50	0
	43	35		20	0
	44	80		12	0
	45	95		65	0
	46	25		30	13
	47	25		13	4
	48	27		62	20
	49	6		120	17
	50	18		70	0
	51	23		90	0
	52	90		96	19
	53	110		37	0
	54	2		19	4
	55	0		40	0
	56	44		39	0
	57	28		23	0
	58	6		39
	59	4		50
	60	18		34
	61	27		17
	62	11		23
	63	20		24
	64	6
	65	5
	66	2
	67	65
	68	23

## Sheet: 2Q
		Figure 2Q
		dome-MESO>/+	dome-MESO>GatRNAi	dome-MESO>Gat	dome-MESO>SsadhRNAi
	1	286	13	290	120
	2	77	12	650	14
	3	63	86	130	42
	4	620	35	220	34
	5	240	370	160	6
	6	120	57	450	102
	7	180	200	115	109
	8	268	55	730	49
	9	194	150	570	135
	10	460	77	150	94
	11	170	430	190	50
	12	130	44	150	70
	13	80	8	410	120
	14	480	30	390	20
	15	320	35	460	90
	16	200	90	100	100
	17	110	154	300	105
	18	200	45	220	63
	19	146	23	380	90
	20	190	33	290	110
	21	460	6	1190	410
	22	30	3	490	37
	23	210	24	720
	24	110	8	790
	25	97	7	270
	26	50	28	290
	27	340	30	560
	28	70	18	280
	29	460	42	970
	30	150	30	320
	31	77	80	650
	32	430	14	150
	33	450	15	2200
	34	380	5	720
	35	220	11	150
	36	50	15	490
	37	40	20	1180
	38	380		240
	39	180		840
	40	150		550
	41	120
	42	430
