# Supplementary material for: Metabolic control of cellular immune-competency by odors in Drosophila
Source: eLife. 2020 Dec 29;9:e60376. doi: 10.7554/eLife.60376 (PMC7808736; doi:10.7554/eLife.60376)
Supplement: Figure 3—figure supplement 1—source data 1. [file elife-60376-fig3-figsupp1-data1.xlsx]

## Sheet: Figure 3-figure supplement 1I
																														Figure 3-figure supplement 1Z
		Figure 3-figure supplement 1I
		Ct values	Ct values	Relative fold change in Ldh
		rpS20	Sima	expression with respective of rpS20
		Cont (un-infected)
		18.784	24.7413	0.903703
		18.6869	24.8144	0.994138
		18.6832	24.8621	0.961829
		Cont (infected)
		17.9012	23.3541	1.31916
		17.518	23.3495	1.3234
		17.5785	23.3156	1.35484

## Sheet: Figure 3-figure supplement 1J
		Figure 3-figure supplement 1J
		Tep4>/+	Tep4>simaRNAi	Tep4>Hph
	1	8	4	13
	2	20	1	9
	3	32	0	4
	4	12	20	4
	5	4	25	16
	6	110		14
	7	140		14
	8	180		8
	9	45		3
	10	48		2
	11	45		5
	12	20		2
	13	9		2
	14	40		4
	15	13
	16	0
	17	0
	18	150
	19	180
	20	45
	21	50
	22	20
	23	0
	24	30
	25	10

## Sheet: Figure 3-figure supplement 1K
		Figure 3-figure supplement 1K
		Tep4>/+	Tep4>simaRNAi	Tep4>Hph
	1	70	110	310
	2	620	190	250
	3	1750	120	100
	4	100	220	90
	5	150	280	50
	6	310	320	400
	7	210	470	40
	8	270	200	50
	9	450	220	150
	10	400	350	110
	11	100	100	450
	12	380	510	300
	13	180	150	180
	14	200		100
	15	200		400
	16	500		300
	17	100		210
	18	1000		310
	19	100		200
	20	100		320
	21	400
	22	500
	23	500
	24	100
	25	620
	26	200
	27	200
	28	500
	29	300
	30	1550
	31	350
	32	50
	33	1240
	34	700
	35	650
	36	500
	37	300
	38	350

## Sheet: Figure 3-figure supplement 1L
		Figure 3-figure supplement 1L
		dome-MESO>/+		dome-MESO>simaRNAi		dome-MESO>Hph		dome-MESO>HphRNAi		dome-MESO>LdhRNAi
		Lamellocyte counts mm2	Total cell counts mm2	Lamellocyte counts mm2	Total cell counts mm2	Lamellocyte counts mm2	Total cell counts mm2	Lamellocyte counts mm2	Total cell counts mm2
	1	65.1639	503.752	5.44285	357.249	27.7091	338.941	92.8683	280.556	19.1199
	2	38.2399	369.522	9.40129	526.472	39.5844	220.683	150.618	391.373	19.1199
	3	40.9713	416.737	4.94805	226.126	7.42207	377.041	133.449	783.527	19.9003
	4	42.5321	202.515	1.48441	276.596	21.7714	279.07	112.769	260.265	10.5355
	5	37.8497	314.503	1.48441	299.852	4.94805	210.787			34.7281

## Sheet: Figure 3-figure supplement 1Q
		Figure 3-figure supplement 1Q
		dome-MESO>/+	Fold change	dome-MESO>simaRNAi	Fold change	dome-MESO>Gat	Fold change	dome-MESO>/+	Fold change	dome-MESO>GABABR1RNAi	Fold change
	1	2024.19	0.918145	1885.08	0.855045	3351.57	1.52023	1503.92	0.975323	1737.05	1.12651
	2	2511.15	1.13902	3365.49	1.52654	3258.09	1.47782	777.374	0.504142	1811.52	1.17481
	3	1848.04	0.838244	1155.24	0.524001	3937.34	1.78592	1004.29	0.651303	1392.56	0.903102
	4	2141.47	0.971341	1003.66	0.455245	3709.77	1.6827	1643.11	1.06559	1844	1.19587
	5	2675.02	1.21335	1686.68	0.765056	3817.96	1.73177	1428.75	0.926574	2218.11	1.43849
	6	2340.08	1.06143	2130.24	0.966247	3733.31	1.69338	2519.32	1.63383	2649.8	1.71845
	7	2681.09	1.21611	1388.47	0.629791	2648.96	1.20153	1611.7	1.04522	923.711	0.599044
	8	1717.3	0.778945	1090.59	0.494678	3173.44	1.43943	1281.9	0.83134	1814.96	1.17704
	9	1997.69	0.906126	1242.29	0.563487	2867.71	1.30075	2107.38	1.36668	1458.93	0.946146
	10	1795.37	0.814355	1854.04	0.840966	3322.66	1.50711			3396.89	2.20295
	11	2360.13	1.07052			3525.98	1.59934
	12	2364.29	1.07241			3227.33	1.46387
	13					3450.63	1.56516
	14					3259.96	1.47867
	15					3316.6	1.50436

## Sheet: Figure 3-figure supplement 1T
		Figure 3-figure supplement 1T
		dome-MESO>/+
		%Pxn+ area	%Dome+ %Pxn+ area	%Dome+ area
	1	35.2734	5.04668	59.6799
	2	32.7879	9.57772	57.6344
	3	34.149	5.27482	60.5762
	4	27.2226	0.370792	72.4066
	5	26.5815	1.58476	71.8338
	6	17.9636	7.8375	74.1989
		dome-MESO>simaRNAi
		%Pxn+ area	%Dome+ %Pxn+ area	%Dome+ area
	1	51.5924	-2.64086	51.0485
	2	29.1163	19.7738	51.1099
	3	37.9385	25.5314	36.5301
	4	41.1685	5.84329	52.9882
	5	34.634	15.917	49.449
	6	37.4363	14.558	48.0057
	7	34.1313	19.6082	46.2605
	8	41.2339	10.6738	48.0923
	9	32.7655	9.93203	57.3025
	10	41.6957	17.9597	40.3445
	11	38.7725	18.2675	42.96
	12	47.7117	13.2052	39.0831
	13	51.5961	11.6184	36.7856
	14	39.6137	26.8933	33.493
	15	40.2668	9.18558	50.5476
