# Supplementary material for: Metabolic control of cellular immune-competency by odors in Drosophila
Source: eLife. 2020 Dec 29;9:e60376. doi: 10.7554/eLife.60376 (PMC7808736; doi:10.7554/eLife.60376)
Supplement: Figure 3—figure supplement 2—source data 1. [file elife-60376-fig3-figsupp2-data1.xlsx]

## Sheet: Figure 3-figure supplement 2A
		Figure 3-figure supplement 2A
		Ct values	Ct values	Relative fold change in Ldh
		rpS20	Ldh	expression with respective of rpS20
		Cont (Un-infected)
		18.784	29.4611	0.993153
		18.6869	29.3821	1.04904
		18.6832	29.5104	0.959827
		Cont (6HPI)
		17.9012	23.5152	29.525
		17.518	23.5639	28.5433
		17.5785	23.5047	29.7406

## Sheet: Figure 3-figure supplement 2D
		Figure 3-figure supplement 2D
		dome-MESO>/+	dome-MESO>LdhRNAi
	1	18	18
	2	27	2
	3	11	4
	4	20	1
	5	6	4
	6	5	19
	7	2	0
	8	65	0
	9	23	0
	10	39	35
	11	29	1
	12	71	8
	13	13	0
	14	15	0
	15	18	0
	16	35
	17	11
	18	7
	19	14

## Sheet: Figure 3-figure supplement 2E
		Figure 3-figure supplement 2E
		dome-MESO>/+	dome-MESO>LdhRNAi
	1	400	40
	2	460	110
	3	405	120
	4	550	45
	5	336	67
	6	150	48
	7	493	35
	8	123	20
	9	234	30
	10	170	40
	11	134	69
	12	120	85
	13	115	20
	14	135	120
	15	360
	16	85
	17	208
	18	79
	19	295
	20	50
	21	160
	22	182
	23	463
	24	293
	25	190
	26	184
	27	189
