# Supplementary material for: Metabolic control of cellular immune-competency by odors in Drosophila
Source: eLife. 2020 Dec 29;9:e60376. doi: 10.7554/eLife.60376 (PMC7808736; doi:10.7554/eLife.60376)
Supplement: Figure 3—source data 1. [file elife-60376-fig3-data1.xlsx]

## Sheet: Figure 2E
		Figure 3E
		Control (UI)	Control (6HPI)
	1	1.00647	1.15355
	2	1.18446	1.13268
	3	1.19439	1.0497
	4	0.918819	0.934959
	5	0.813846	1.00598
	6	0.963012	1.11238
	7	0.919009	3.86578
	8	1.13256	4.24314
	9	1.09923	2.31804
	10	0.79708	2.96219
	11	0.997075	2.6156
	12	0.974051	2.40155
	13		2.43677
	14		1.97484
	15		2.86703
	16		3.11678

## Sheet: Figure 3J
		Figure 3J
		dome-MESO>/+	Fold change	dome-MESO>GatRNAi	Fold change	dome-MESO>GatRNAi (SF)	Fold change	dome-MESO>/+	Fold change	dome-MESO>SsadhRNAi	Fold change	dome-MESO>SsadhRNAi(SF)	Fold change
	1	1286.69	1.08926	690.028	0.584151	2160.62	1.8291	1941.93	0.932626	1147.68	0.551182	2820.38	1.35451
	2	1503.06	1.27243	949.453	0.80377	2525.8	2.13824	2271.27	1.0908	1501.45	0.721082	2150.2	1.03265
	3	1274.56	1.079	738.298	0.625015	1924.76	1.62943	2251.04	1.08108	1292.47	0.620719	1684.63	0.809058
	4	1284.19	1.08714	678.266	0.574194	2923.46	2.47489	2322.28	1.1153	1202.65	0.577583	2069.1	0.993703
	5	1180.06	0.998991	1275.62	1.07989	1205.64	1.02065	2085.54	1.0016	963.21	0.462589	1717.76	0.824966
	6	957.713	0.810763	435.405	0.368597	1100.65	0.931767	1997.49	0.959312	930.814	0.447031	1829.74	0.878747
	7	1004.1	0.850032	600.981	0.508768	1072.89	0.908267	1635.21	0.785321	1440.35	0.691739	2658.6	1.27681
	8	1028.19	0.870429	1005.95	0.8516	1236.08	1.04642	2160.56	1.03762	1146.87	0.550794	2713.92	1.30338
	9	993.232	0.840832	711.929	0.602692	942.807	0.798145	2074.61	0.996349	851.298	0.408843
	10	1696.29	1.43601	512.06	0.43349	1185.79	1.00384			856.414	0.4113
	11	1244.24	1.05333	698.021	0.590918	1175.41	0.995056			1123.29	0.539467
	12	985.26	0.834083	1525.72	1.29162	1874.26	1.58668
	13	918.651	0.777695	870.062	0.736561	866.963	0.733938
	14			566.996	0.479997
	15			560.105	0.474164
	16			973.13	0.823815
	17			620.904	0.525634
	18			887.494	0.751319
	19			661.266	0.559803
	20			538.209	0.455627
	21			628.348	0.531935
	22			795.836	0.673724
	23			830.318	0.702916

## Sheet: Figure 3O
	Figure 3O
	dome-MESO>/+ 6HPI	fold change	dome-MESO>GatRNAi6HPI	fold change	dome-MESO>GatRNAi 6HPI	fold change	dome-MESO>GatRNAi 6HPI (SF)	fold change	dome-MESO>SsadhRNAi6HPI	fold change	dome-MESO>SsadhRNAi6HPI SF	fold change
1	1973.79	0.891368	1180.86	0.533279	1635.99	1.02127	3465.44	2.1633	1410.59	0.637027	1456.34	0.805143
2	2262.5	1.02175	1097.14	0.495473	1626.58	1.01539	2877.7	1.7964	1664.73	0.751796	1930.93	1.06752
3	2270.76	1.02548	1123.76	0.507492	1469.84	0.917546	1807.16	1.12812	1408.36	0.63602	2317.91	1.28146
4	2320.41	1.0479	1065.11	0.481004	1675.28	1.0458	3112.36	1.94289	1383.2	0.624655	2142.89	1.1847
5	1956.87	0.883725	1021.72	0.461409			3248.84	2.02809	1683.81	0.760414	3399.6	1.87948
6	2172.28	0.981008	801.659	0.362031			2865.6	1.78885	2370.39	1.07048	2691.32	1.48791
7	2614.45	1.18069	873.899	0.394655			2621.8	1.63666	2740.56	1.23765	1762.46	0.974382
8	2237.24	1.01035	1100.05	0.496786			2127.1	1.32784			2261.72	1.2504
9	2146.86	0.969528	1105.18	0.499102			3060	1.91021			2267.55	1.25362
10	2177.38	0.983308	730.723	0.329996
11	2225.18	1.0049	908.908	0.410465

## Sheet: Figure 3T
		Figure 3T
		dome-MESO>/+	dome-MESO>simaRNAi	dome-MESO>Hph	dome-MESO>HphRNAi	dome-MESO>GatRNAi	dome-MESO>GatRNAi;HphRNAi
	1	16	6	2	8	0	10
	2	2	16	3	17	0	30
	3	11	10	4	8	1	6
	4	5	5	10	9	3	4
	5	5	2	20	18	5	0
	6	10	4	0	20	4	7
	7	25	5	0	5	3	3
	8	5	4	0	11	0	2
	9	7	9	4	5	3	0
	10	7	16	18	29	0	150
	11	33	5	22	10	0	56
	12	24	0	22	0	15	50
	13	2	10	35	0	8	40
	14	2	8	20	2	26	22
	15	10	10	10	4	7	50
	16	11	0	2	0	24	30
	17	28	0	0	0	4
	18	33	1	0	6	10
	19	2	2	0	0	12
	20	0	4		24	5
	21	5	5		0	7
	22	0	9		0	8
	23	7	2		90	2
	24	2	4		20	0
	25	25	5		46	30
	26	24	5		13	0
	27	20	6		15
	28	0	0		9
	29	16	8		4
	30	8	2		10
	31	70	15		0
	32	72	0		0
	33	1	5		120
	34	0	4		110
	35	7	0		10
	36	2	3		52
	37	4	0		48
	38	4	14		4
	39	20	5		0
	40	26	2		34
	41	24	0		6
	42	35	19		0
	43	80	0		0
	44	95	4		6
	45	25	20		4
	46	27	5		35
	47	6	0		20
	48	18	0		4
	49	23	0		67
	50	90	0		90
	51	110	0		30
	52	2	2		39
	53	0	0
	54	44	0
	55	28	4
	56	6	0
	57	4	2
	58	5	0
	59	2	0
	60	30	0
	61	45	5
	62	20	0
	63	21	0
	64	25	10
	65	30	0
	66	24	1
	67	15	4
	68	60	0
	69	55	35
	70	0	25
	71	2	0
	72	30	20
	73	18	0
	74	65	0
	75	45	0
	76	25	0
	77	10	0
	78	60
	79	10
	80	20
	81	75

## Sheet: Figure 3U
		Figure 3U
		dome-MESO>/+	dome-MESO>simaRNAi	dome-MESO>Hph	dome-MESO>HphRNAi	dome-MESO>GatRNAi	dome-MESO>GatRNAi;HphRNAi
	1	180	8	10	676	246	314
	2	20	5	20	551	24	452
	3	230	0	23	501	54	252
	4	102	2	8	210	112	826
	5	111	3	200	191	64	449
	6	40	2	29	710	217	710
	7	40	5	50	240	44	160
	8	263	16	14	730	8	222
	9	100	62	15	250	30	77
	10	550	3	350	110	35
	11	180	3	172	140	90
	12	20	112	3	471	154
	13	230	8	10	543	305
	14	102	118	120	120	45
	15	111	12	13	679	23
	16	40	8	50	140	33
	17	445	43	82	911	6
	18	318	36	48	495	3
	19	300	140	230		24
	20	250	100	53		8
	21		31	239		7
	22		28	73		28
	23		15			30
	24		10			18
	25		18
	26		41
	27		28
	28		51
	29		8
