# Supplementary material for: Metabolic control of cellular immune-competency by odors in Drosophila
Source: eLife. 2020 Dec 29;9:e60376. doi: 10.7554/eLife.60376 (PMC7808736; doi:10.7554/eLife.60376)
Supplement: Figure 4—figure supplement 1—source data 1. [file elife-60376-fig4-figsupp1-data1.xlsx]

## Sheet: Figure 4-figure supplement 1D
		Figure 4-figure supplement 1D
		Control	fold change	Control (GF)	fold change	Control	fold change	Control (SF)	fold change
	1	1998.35	0.931002	2235.74	1.0416	303.179	0.330283	1537.06	1.67447
	2	1835.97	0.855352	1620.84	0.755128	603.033	0.656944	1272.37	1.38612
	3	2280.19	1.06231	2675.92	1.24667	1057.77	1.15233	1303.21	1.41971
	4	2154.61	1.0038	2315.72	1.07886	1102.82	1.20142	1255.69	1.36794
	5	1896.88	0.88373	2290.41	1.06707	573.441	0.624706	1513.73	1.64906
	6	1965.69	0.91579	2482.99	1.15679	694.284	0.756352	1991.01	2.169
	7	2213.63	1.0313	3711.99	1.72936	1061.14	1.15601	2361.02	2.57209
	8	1850.36	0.862058	3365.14	1.56777	710.456	0.77397	1046.39	1.13993
	9	1912.48	0.891	1895.56	0.883114	1345.62	1.46591	1120.95	1.22117
	10	2219.7	1.03413	2170.3	1.01111	1727.63	1.88207	1071.81	1.16762
	11	2303.53	1.07318	2235.53	1.0415			1286.75	1.40178
	12	2917.18	1.35907	2367.9	1.10317			1812.25	1.97426
	13	2741.84	1.27739	3221.24	1.50073			1854.96	2.02079
	14	2476.04	1.15356	1866.55	0.869601			1106.97	1.20593
	15	2731.07	1.27237	1998.1	0.930886			1055.04	1.14936
	16	2367.48	1.10298	2230.98	1.03938			725.313	0.790155
	17	2086.42	0.972036	2168.41	1.01023			1357.81	1.4792
	18	1467.45	0.683666	2207.87	1.02862			771.435	0.840401
	19	1363.6	0.63528	3057.65	1.42452			855.204	0.931659
	20			3270.4	1.52363			2341.87	2.55123
	21			3748.73	1.74648			2353.56	2.56396
	22			3268.38	1.52269			878.986	0.957567
	23							657.166	0.715916

## Sheet: Figure 4-figure supplement 1E
		Figure 4-figure supplement 1E
		dome-MESO>/+ (RF)	dome-MESO>/+ (GF)	dome-MESO>/+(SF)	dome-MESO>simaRNAi (RF)	dome-MESO>simaRNAi(GF)	dome-MESO>simaRNAi (SF)
	1	60	689	312	8	109	30
	2	47	560	190	5	130	15
	3	35	780	516	0	107	36
	4	480	530	621	2	130	15
	5	220	310	480	3	160	42
	6	841	963	490	2	40	50
	7	140	600	380	5	18	110
	8	475	440		16	125	50
	9	180	250		62	160	103
	10	20			3		4
	11	230			3		0
	12	102			112		3
	13	111			8		114
	14	40			118		4
	15	780			12		0
	16	40			8		2
	17	263			43		1
	18	100			36		3
	19	550			140		1
	20	180			100		31
	21	20			31		22
	22	230			28		102
	23	102			15		23
	24	111			10		100
	25	40			18
	26	780			41
	27	445			28
	28	318			51
	29	300			8
	30	250
	31	40
	32	813
	33	452
	34	723
	35	63
	36	300
	37	290
	38	200
	39	245
	40	50
	41	302
	42	509

## Sheet: Figure 4-figure supplement 1F
		Figure 4-figure supplement 1F
		Orco>/+	Orco>Hid,rpr	Orco>Hid,rpr (GF)	Orco>Hid,rpr (SF)
	1	173	24	127	51
	2	108	9	136	90
	3	53	50	142	120
	4	34	4	25	34
	5	19	10	21	56
	6	46	5	14	43
	7	23	23	11	23
	8	26	11	31	5
	9	17	33	22	16
	10	14	0	23	24
	11	44	29	27	9
	12	24	14	15	17
	13	26	17	27	34
	14	56	0		54
	15	68	0		24
	16	45	6		15
	17	36	0		67
	18		0		36
	19		5

## Sheet: Figure 4-figure supplement 1G
		Figure 4-figure supplement 1G
		Orco>/+	Orco>Hid,rpr	Orco>Hid,rpr (GF)	Orco>Hid,rpr (SF)
	1	173	24	127	51
	2	108	9	136	90
	3	53	50	142	120
	4	80	34	84	110
	5	91	12	96	93
	6	40	17	116	73
	7	68	47	85	82
	8	73	16	107	63
	9	220	15	87	45
	10	124	37	65	85
	11	128	16	34	134
	12	77	15	97	114
	13	136	37	102	78
	14	56	24	56	68
	15	114	24	87	134
	16	220	36	34	148
	17	154	25		65
	18	141	16		78
	19	124	66		132
	20	91	15		102
	21	138	46
	22	146	22
	23	176	24
	24	137	28
	25	108	64
	26	113	26
	27	136	18
	28	70	17
	29	73	15
	30	65	32
	31	123	67
	32	63	36

## Sheet: Figure 4-figure supplement 1K
		Figure 4-figure supplement 1K
		Orco>/+	Fold change	Orco>Hid,rpr	Fold change	Orco>Hid,rpr (SF)	Fold change
	1	2656.6	1.52241	689.246	0.394985	791.214	0.45342
	2	2433.99	1.39484	889.147	0.509543	1975.37	1.13202
	3	1163.01	0.666483	964.758	0.552873	2064.51	1.1831
	4	1252.75	0.717912	1016.22	0.582366	1663.55	0.953327
	5	1621.36	0.929151	672.592	0.385442	1854.6	1.06282
	6	914.082	0.523832	847.442	0.485643	1655.46	0.948695
	7	1061.96	0.608577	676.195	0.387506	1177.86	0.674994
	8	1043.38	0.597929	1108.03	0.634979	2293.14	1.31413
	9	1979.57	1.13443	1013.01	0.580525	1994.54	1.14301
	10	1067.22	0.611591	1067.72	0.611875	1687.18	0.966869
	11	2858.26	1.63798	996.31	0.570954	1775.59	1.01753
	12	2887.71	1.65486			1901.24	1.08954
