# Supplementary material for: Metabolic control of cellular immune-competency by odors in Drosophila
Source: eLife. 2020 Dec 29;9:e60376. doi: 10.7554/eLife.60376 (PMC7808736; doi:10.7554/eLife.60376)
Supplement: Figure 4—source data 1. [file elife-60376-fig4-data1.xlsx]

## Sheet: Figure 4D
	Figure 4D
	Cont (W1118)	orco1/orco1	orco1/orco1 (GF)	orco1/orco1 (SF)
1	45	4	18	15
2	34	11	55	19
3	35	15	60	23
4	79	6	14	7
5	93	7	22	15
6	42	11	21	14
7	24	15	3	13
8	80	10		20
9		1		13
10		4		16
11				34
12				8
13				14

## Sheet: Figure 4E
		Figure 4E
		Cont (W1118)	orco1/orco1	orco1/orco1(GF)	orco1/orco1(SF)
	1	537	180	440	350
	2	652	147	50	200
	3	436	130	600	600
	4	123	40	360	390
	5	230	70	570	837
	6	300	10	130	220
	7	150	11	1130	150
	8	300	130	1101	200
	9	350	198	1290	250
	10	270	89	270	70
	11	170	70	450	200
	12	200	57	230	270
	13	300	470	350	600
	14	350	40	200	1000
	15		36	250
	16		58	390
	17		18	530
	18		120	210
	19		48
	20		250
	21		100
	22		55
	23		300
	24		170
	25		120
	26		25
	27		140
	28		100
	29		98
	30		90
	31		180
	32		290
	33		400
	34		390
	35		7
	36		38
	37		26
	38		30
	39		300
	40		120
	41		20

## Sheet: Figure 4H
		Figure 4H
		Kurs6>/+	Kurs6>Gad1RNAi	Kurs6>Gad1RNAi(GF)	Kurs6>Gad1RNAi(SF)
	1	25	5	56	14
	2	13	0	35	32
	3	27	12	25	12
	4	11	18	46	11
	5	49	15	50	14
	6	50	4	79	23
	7	65	0	67
	8	32	0	88
	9	31	0	82
	10	40	4	48
	11	37	10	38
	12	36	14
	13	32	6
	14	65	0
	15	32	6
	16	28	0
	17	30	12
	18	48	1
	19		2
	20		0
	21		21
	22		0

## Sheet: Figure 4I
		Figure 4I
		Kurs6>/+	Kurs6>Gad1RNAi	Kurs6>Gad1RNAi (GF)	Kurs6>Gad1RNAi (SF)
	1	537	6	135	290
	2	652	35	169	228
	3	436	120	281	593
	4	123	165	189	44
	5	405	25	155	486
	6	294	12	67	66
	7	201	24	160	226
	8	652	68	207	178
	9	633	9	102	121
	10	304	100	262	26
	11	348	7	392	274
	12	308	11	197	556
	13	496	20		242
	14	341	4		477
	15	259	3		452
	16	331	4		157
	17	460	24		379
	18	296	21		625
	19	1723	0		349
	20	1690	4		240
	21	1628	5		89
	22	1515	7		145
	23	1264	4		78
	24	80	74		104
	25	360	44		640
	26				129
