# Supplementary material for: Metabolic control of cellular immune-competency by odors in Drosophila
Source: eLife. 2020 Dec 29;9:e60376. doi: 10.7554/eLife.60376 (PMC7808736; doi:10.7554/eLife.60376)
Supplement: Figure 5—figure supplement 1—source data 1. [file elife-60376-fig5-figsupp1-data1.xlsx]

## Sheet: Figure 5-figure supplement 1A
		Figure 5-figure supplement 1A
		Hml>/+ (RF)	Hml>/+ (WOF)	orco1/orco1 (RF)	orco1/orco1 (WOF)
	1	300	593	119	257
	2	410	570	76	378
	3	400	580	34	129
	4	410	1000	155	171
	5	450	400	182	203
	6	500	800	39	275
	7	200	270	153	127
	8	250	950	69	119
	9	375	1170	167	250
	10	100	1420	151	136
	11	560	1150	300	370
	12	800	650	369	223
	13	1123	1200	255	88
	14	400	1160	258	269
	15	600	1000	227	240
	16	1500	1096	207	265
	17	250	300	218	216
	18	1590	1088	149	215
	19	590	2995	163	25
	20			148	195
	21			208	343
	22			149	253
	23			130	163
	24			486	196
	25			146	233
	26			98
	27			263

## Sheet: Figure 5-figure supplement 1B
		Figure 5-figure supplement 1B
		RF	WOF
	1	1064	1124
	2	711	379.5
	3	1201	702
	4	578.5	1149
	5	822.5	911
	6	935.5	914.5
	7	1082.5	1196.5
	8	1216.5	1825
	9	884.5	974
	10	1472	1493.5
	11	516	744
	12	994	1624.5

## Sheet: Figure 5-figure supplement 1C
		Figure 5-figure supplement 1C
		Hml>/+ (RF)	Hml>/+ (WOF)
	1	8.928	61.118
	2	6.04	40.902
	3	7.834	50.322

## Sheet: Figure 5-figure supplement 1D
		Figure 5-figure supplement 1D
		Hml>/+ (RF)	Hml>/+ (Acetic acid)	Hml>/+ (1-octen-3-ol)	Hml>/+ (Acetophenone)
	1	2600	18	680	409
	2	1150	1300	1150	1800
	3	1250	1250	1800	310
	4	2800	290	2100	57
	5	1750	140	215	630
	6	1500	1950	320	450
	7	1400	2200	750	520
	8	680	330	950	350
	9	156	450	290	630
	10	310	650	2050	620
	11	5100	820		226
	12	390	2650		440
	13	490	15		620
	14	385	2010		480
	15	244	153		350
	16	596	910		390
	17	1800	710		90
	18	1850	50		70
	19	1110	350		100
	20	2490	1200		1200
	21	5150	1250		650
	22	280	690		250
	23	490	30		750
	24	390	1250
	25	1100	370
	26	1200	250
	27	210	710
	28	220	120
	29	1200	650
	30	2160	30
	31		610

## Sheet: Figure 5-figure supplement 1E
		Figure 5-figure supplement 1E
		Hml>/+ (RF)	Hml>/+ (Acetic acid)	Hml>/+ (1-octen-3-ol)	Hml>/+ (Acetophenone)
	1	9.26209	1.54747	4.9811	3.79417
	2	6.16042	2.7785	4.71043	2.3113
	3		1.3195	5.45167	3.83248

## Sheet: Figure 5-figure supplement 1J
		Figure 5-figure supplement 1J
		Hml>/+ (RF)	Fold change	Hml>/+ (Acetic acid)	Fold change	Hml>/+ (1-octen-3-ol)	Fold change	Hml>/+ (Acetophenone)	Fold change
	1	1431.1	0.835118	471.072	0.274894	3141.14	1.83302	382.757	0.223358
	2	1034.2	0.603509	1203.85	0.702507	3158.24	1.84299	168.668	0.0984263
	3	1234.42	0.720348	1154.29	0.673587	1231.62	0.718714	903.433	0.527199
	4	1152.1	0.672308	1439.02	0.839742	1081.7	0.631228	1299.71	0.758445
	5	2556.83	1.49204	537.357	0.313575	1762.15	1.02831	1750.44	1.02147
	6	2078.25	1.21276	2026.92	1.18281	1321.75	0.771309	751.387	0.438472
	7	1548.94	0.903883	1063.77	0.620765	1513.84	0.883402	402.257	0.234737
	8	1344.73	0.784721	1133.83	0.661646	1084.42	0.632815	436.434	0.254682
	9	1699.54	0.991769			1830.18	1.068	502.969	0.293508
	10	1526.39	0.890728			2625.09	1.53187	209.977	0.122532
	11	1431.06	0.835095			3509.6	2.04803
	12	1351.26	0.788529
	13	1864.71	1.08815
	14	1665.46	0.971879
	15	2509.03	1.46415
	16	2538.84	1.48154
	17	2165.14	1.26347

## Sheet: Figure 5-figure supplement 1K
		EFigure 5-figure supplement 1K
		GABA				Sima
		Or49a>/+	Fold change	Or49a>Hid	Fold change	Or49a>/+	Fold change	Or49a>Hid	Fold change
	1	1550.23	1.29946	1289.61	1.08099	1261.22	1.32116	868.089	0.909342
	2	944.667	0.791849	1194.99	1.00168	1137.3	1.19135	800.35	0.838384
	3	954.683	0.800246	2256.68	1.89162	1062.17	1.11264	1913.24	2.00416
	4	1243.66	1.04248	2181.91	1.82894	1019.33	1.06777	1558.7	1.63278
	5	1063.14	0.891162	1672.7	1.40211	946.722	0.991712	1274.34	1.33489
	6	1218.26	1.02118			941.479	0.98622
	7	1020.48	0.855399			864.209	0.905277
	8	1242.78	1.04174			336.837	0.352844
	9	1369.86	1.14826			354.457	0.371301
	10	1314.39	1.10176			1355.54	1.41996
	11	1200.7	1.00646			1221.71	1.27977

## Sheet: Figure 5-figure supplement 1L
		Figure 5-figure supplement 1L
		Or42a>/+	Or42a>TrpA1
	1	1408	520
	2	1567	310
	3	1105	793
	4	623	814
	5	981	647
	6	660	245
	7	828	303
	8	1158	803
	9	124	327
	10	627	172
	11	1254
	12	1325
	13	508
	14	1083
	15	186
	16	505
	17	810
