# Supplementary material for: Metabolic control of cellular immune-competency by odors in Drosophila
Source: eLife. 2020 Dec 29;9:e60376. doi: 10.7554/eLife.60376 (PMC7808736; doi:10.7554/eLife.60376)
Supplement: Figure 5—figure supplement 2—source data 1. [file elife-60376-fig5-figsupp2-data1.xlsx]

## Sheet: Figure 5-figure supplement 2A
		Figure 5-figure supplement 2A
		Hml>//+		Percentage
		Total Larvae	20	50
		Melanized	10
		Unmelanized	10
		Hml>/+
		Total Larvae	19	79
		Melanized	15
		Unmelanized	4
		Or49a>/+		Percentage
		Total Larvae	20	50
		Melanized	10
		Unmelanized	10
		Or49a>TrpA1
		Total Larvae	47	77
		Melanized	36
		Unmelanized	11

## Sheet: Figure 5-figure supplement 2B
		Figure 5-figure supplement 2B
		Cont (W1118)		percentage	Orco>/+		percentage	Or42a>/+
	1	Total Larvae	35		Total Larvae	52		Total Larvae	19
	2	Melanized	31	88.5714	Melanized	41	78.8462	Melanized	13
	3	Unmelanized	4	11.4286	Unmelanized	11	21.1538	Unmelanized	7
	4
	5	orco1/orco1			Orco>Hid, rpr			Or42a>Hid
	6	Total Larvae	75		Total Larvae	21		Total Larvae	20
	7	Melanized	14	18.6667	Melanized	3	14.2857	Melanized	2
	8	Unmelanized	61	81.3333	Unmelanized	18	85.7143	Unmelanized	18
	9
	10

## Sheet: Figure 5-figure supplement 2C
		Figure 5-figure supplement 2C
		dome-MESO>/+		dome-MESO>GatRNAi		dome-MESO>SsadhRNAi
		% melanised	% UN melanised	% melanised	% UN melanised	% melanised	% UN melanised
	1	0	100	20	80	0	100
	2	0	100	0	100	0	100
	3	33.3333	66.6667	0	100	0	100
	4	0	100	0	100	25	75
	5	33.3333	66.6667	50	50	0	100
	6	25	75	0	100	0	100
	7	50	50	0	100	0	100
	8	75	25	0	100	20	80
	9	33.3333	66.6667	0	100	66.6667	33.3333
	10	0	100	0	100	0	100
	11	66.6667	33.3333	0	100
	12	20	80
	13	66.6667	33.3333

## Sheet: Figure 5-figure supplement 2D
	Figure 5-figure supplement 2D
	dome-MESO>/+		percentage
	Total Larvae	74
	Melanized	50	67.5676
	Unmelanized	24	32.4324
	dome-MESO>GatRNAi
	Total Larvae	39
	Melanized larvae	8	20.5128
	Unmelanized larvae	31	79.4872
	dome-MESO>SsadhRNAi
	Total Larvae	37
	Melanized larvae	10	27.027
	Unmelanized larvae	27	72.973

## Sheet: Figure 5-figure supplement 2G
			Figure 5-figure supplement 2G
			w1118/w1118	dome-MESO>/+	Hml>/+	Orco>/+	Or42a>/+	OR49a>/+	GH146>/+	Kurs6>/+	UAS-GatRNAi/+	UAS-Gat/+	UAS-SsadhRNAi/+	UAS-simaRNAi/+	UAS-HphRNAi/+	UAS-LdhRNAi/+	UAS-GatRNAi ;UAS-HphRNAi/+	UAS-αKDHRNAi/+	UAS-skapRNAi/+	UAS-SdhARNAi/+
		1	734	210	400	173	42	246	402	537	780	210	485	210	510	680	850	120	289	620
		2	820	113	600	108	1408	591	710	652	750	110	150	228	358	310	310	159	457	220
		3	430	153	450	53	1567	845	350	436	450	370	280	353	450	350	200	587	540	205
		4	560	282	220	80	1105	707	220	405	250	670	420	157	200	220	250	144	250	740
		5	1720	273	870	91	623	178	495	294	550	270	270	269	500	250		390	420	240
		6	420	326	410	40	981	224	1060	652	300	170	220	450	410	410		805	240	440
		7	1520	282	500	68	660	543	310	633	200	50	230					270		720
		8	1900	143	500	73	828	979	640	304	500	70	697					650		1020
		9	680	121	470	220	1158	300	200	348	300	450	244					340		250
		10	537	146		124	124		180	308	250	610						395		620
		11	652	667		128	627		520	496								220		520
		12	436	190		77	1254		220	341										610
		13	123	630		136	1325		310	259										310
		14	230	440		56	508		284	331										350
		15	300	410		114	1083		440	460
		16	150	287		220	186		530	296
		17	300	380		154	505		320	1723
		18	350	396		141	810		670	1690
		19	270	230		124			350	1628
		20	170	250		91			270	1515
		21	200	260		138			460	1264
		22	300	230		146			310	360
		23	350			176			350
		24				137			820
		25				108			550
		26				113
		27				136
		28				70
		29				73
		30				65
		31				123
		32				63
		33				72
		34				86
