# Supplementary material for: Metabolic control of cellular immune-competency by odors in Drosophila
Source: eLife. 2020 Dec 29;9:e60376. doi: 10.7554/eLife.60376 (PMC7808736; doi:10.7554/eLife.60376)
Supplement: Figure 5—source data 1. [file elife-60376-fig5-data1.xlsx]

## Sheet: Figure 5A
		Figure 5A
		Or49a>/+ (RF)	Or49a>/+ (WOF	Or49a>Hid (WOF)	Or49a>Hid (RF)
	1	39	114	18	46
	2	5	156	41	9
	3	45	103	4	11
	4	31	119	31	28
	5	2	71	42	1
	6	27	12	23	3
	7	1	26	81	29
	8	2	40	17	5
	9	1	118	8	1
	10	42	39	70	23
	11	54	35	18	1
	12	8	112	26	50
	13	23	101	39	27
	14	33	117		24
	15	21	95		61
	16	8	53		36
	17	49	163		87
	18	55			38
	19	66			24
	20	54			77
	21	6
	22	15
	23	8

## Sheet: Figure 5B
		Figure 5B
		Or49a>/+ (RF)	Or49a>/+ (WOF)	Or49a>Hid (WOF)	Or49a>Hid (RF)
	1	403	531	273	80
	2	428	680	73	441
	3	242	263	1265	56
	4	340	270	365	259
	5	866	1285	557	1574
	6	146	250	1265	97
	7	210	1232	132	1045
	8	300	258	675	858
	9	1930	362	827	852
	10	246	689	1098	131
	11	591	435	1330	484
	12	1272	863	747	656
	13	845	550	304	1026
	14	707	252	106	1115
	15	178	1470	263	1503
	16	224	1361	196	1379
	17	543	2225	191	426
	18	979	740	174	271
	19	1866	533	227	304
	20	300	2222	183	124
	21	233	1293	262	469
	22	119	1066	408	212
	23	458	478	287	187
	24	264	1316	242	532
	25	549	857	185	197
	26	597	1771	340	82
	27	480	842	83	94
	28	706	444	65	75
	29	135	797	72	85
	30	727	655
	31	511	814
	32	140	333
	33	1070	168
	34	908	1070
	35	114	366
	36	155
	37	390
	38	435

## Sheet: Figure 5C
		Figure 5C
		Or49a>/+ (RF)	Or49a>/+ (WOF)	Or49a>Hid,rpr (WOF)	Or49a>Hid,rpr (RF)
	1	42.9	103.068	99.434	29.0633
	2	67.74	83.714	70.618	30.4033
	3	69.12	86.396	66.576	23.6133
	4	77.6433	81.62	47.652	69.8967
	5	66.14	131.162	53.314	65.0833
	6	44.6567	117.538	44.55	65.3433
	7	18.5667			84.85
	8	16.2233			80.92
	9	10.7033			97.7767

## Sheet: Figure 5P
		Figure 5P
		GABA stainings
		Or49a>/+ (RF)	Fold change	Or49a>/+ (WOF	Fold change	Or49a>Hid (RF)	Fold change	Or49a>Hid (WOF)	Fold change
	1	1550.23	1.29946	2357.88	1.97645	1289.61	0.750129	1129.27	0.656864
	2	944.667	0.791849	2363.08	1.98081	1194.99	0.695096	1687.74	0.981715
	3	954.683	0.800246	1420.9	1.19105	2256.68	1.31265	1780.54	1.03569
	4	1243.66	1.04248	1308.89	1.09715	2181.91	1.26916	1189.86	0.692107
	5	1063.14	0.891162	1537.1	1.28844	1672.7	0.972966	1065.94	0.620031
	6	1218.26	1.02118	1213.8	1.01744			1826.65	1.06251
	7	1020.48	0.855399	1631.23	1.36735			2148.72	1.24985
	8	1242.78	1.04174	1898.71	1.59156			1569.45	0.912906
	9	1369.86	1.14826	971.262	0.814142			1599.49	0.930378
	10	1314.39	1.10176	1065.83	0.893413
	11	1200.7	1.00646	2280.67	1.91173
	12			2204.33	1.84774
	13			1365.54	1.14464
	14			1219.52	1.02224

## Sheet: Figure 5Q
		Figure 5Q
		Sima stainings
		Or49a>/+ (RF)	Fold change	Or49a>/+ (WOF	Fold change	Or49a>Hid (RF)	Fold change	Or49a>Hid (WOF)	Fold change
	1	1261.22	1.32116	1449.19	1.51806	868.089	0.676638	1018.73	0.794052
	2	1137.3	1.19135	1539	1.61213	800.35	0.623838	1625.77	1.26722
	3	1062.17	1.11264	1000.24	1.04777	1913.24	1.49129	1702	1.32663
	4	1019.33	1.06777	995.595	1.04291	1558.7	1.21494	1126.25	0.877865
	5	946.722	0.991712	1002.67	1.05032	1274.34	0.99329	1012.3	0.789041
	6	941.479	0.98622	952.287	0.997541			1094.88	0.853414
	7	864.209	0.905277	1782.14	1.86683			1417.95	1.10523
	8	336.837	0.352844	2123.41	2.22432			1232.19	0.960437
	9	354.457	0.371301	1244.93	1.3041			1357.92	1.05844
	10	1355.54	1.41996	1409.36	1.47634
	11	1221.71	1.27977	1855.68	1.94386
	12			1778.69	1.86322
	13			863.346	0.904374
	14			852.977	0.893512

## Sheet: Figure 5R
		Figure 5R
		Or49a>/+	Or49a>TrpA1
	1	40	33
	2	72	56
	3	68	168
	4	33	159
	5	123	47
	6	27	123
	7	138	92
	8	25	229
	9	147	81
	10	15	333
	11	20	362
	12	5	374
	13	18	142
	14	25	92
	15	16	318
	16	109	87
	17	89	79
	18	10	110
	19	38	212
	20	20	66
	21	23	140
	22	11	173
	23	27	144
	24	31	101
	25	74	128
	26	43	200
	27	92	93
	28	41	134
	29	126	137
	30	20	91
	31	129	127
	32	15	71
	33	109	36
	34	3	186
	35	21	70
	36	6	230
	37	28	129
	38	86	117
	39	56	23
	40	5	82
	41	30	231

## Sheet: Figure 5S
		Figure 5S
		Or49a>/+	Or49a>TrpA1
	1	246	1283
	2	591	322
	3	1272	1674
	4	845	1283
	5	707	1298
	6	178	1386
	7	224	675
	8	543	200
	9	979	795
	10	300	1106
	11	233	932
	12	119	987
	13	458	790
	14	264	641
	15	549	1112
	16	597	1180
	17	480	308
	18	706
	19	135

## Sheet: Figure 5T
		Figure 5T
		Hml>/+ (RF)		Hml>/+ (WOF)		Or49a>/+		Or49a>TrpA1
		% Melanised	% UN-melanised	% melanised	% UN-melanised	% Melanised	% UN-elanised	% Melanised	% UN-melanised
	1	75	25	62.5	37.5	25	75	66.6667	33.3333
	2	0	100	75	25	11.1111	88.8889	33.3333	66.6667
	3	0	100	57	43	28.5714	71.4286	50	50
	4	0	100	75	25	0	100	0	100
	5	57	43	100	0	0	100	0	100
	6	37.5	62.5	71	29	0	100	66.6667	33.3333
	7	61.5	38.5	100	0	60	40	50	50
	8	62.5	37.5	28.5	71.5	0	100	33.3333	66.6667
	9	0	100	40	60	20	80	100	0
	10	0	100	33	67	0	100	100	0
	11	0	100	33	67	0	100	75	25
	12	0	100	0	100	0	100	100	0
	13	0	100	0	100	50	50	75	25
	14	0	100	0	100	33.3333	66.6667	25	75
	15	0	100	25	75	0	100	25	75
	16	54.5	45.5	0	100	25	75	60	40
	17	28.5	71.5	25	75	33.3333	66.6667	0	100
	18	14.2	85.8	81	19	100	0	0	100
	19	20	80	33	67	0	100	50	50
	20	25	75				100	50	50
	21							0	100
	22							50	50
	23							75	25
	24							50	50
	25							0	100
	26							0	100
	27							100	0
	28							25	75
	29							0	100
	30							50	50
	31							0	100
	32							33.3333	66.6667
	33							25	75
	34							0	100
	35							0	100
	36							50	50
	37							80	20
	38							50	50
	39							33.3333	66.6667
	40							66.6667	33.3333
	41							20	80
	42							33.3333	66.6667
	43							25	75
	44							50	50
	45							66.6667	33.3333
	46							66.6667	33.3333
	47							40	60
