# Supplementary material for: Metabolic control of cellular immune-competency by odors in Drosophila
Source: eLife journal article supplement (doi:10.7554/elife.60376), 2020-12-29
Supplement: supp [file elife_poa_e60376_Supplementary_file_1_source_data_1.xlsx]

## Sheet: Supplementary File 1
			Supplementary File 1. Total lamellocytes counts in lymph gland tissues from un-infected wandering 3rd instar larvae.
			Control (W1118)	Orco1/Orco1	Orco>+	Orco>Hid	Or42a>+	Or42a>Hid	Or49a>+	Or49a>Hid	Kurs6/+	Kurs6/Gad1 RNAi		dome-MESO-GFP >/+	dome-MESO-GFP> GABABR1RNAi	dome-MESO>GatRNAi	dome-MESO-GFP>Gat	dome-MESO-GFP> SsadRNAi	dome-MESO-GFP>KdhRNAi	dome-MESO-GFP> skapRNAi	dome-MESO-GFP>SdhRNAi	dome-MESO-GFP>HphRNAi	dome-MESO-GFP>hph (ov)	dome-MESO-GFP>simaRNAi	domeMESO-GFP>ldhRNAi		Hml>/+ (RF)	Hml>/+ (WOF)	Hml>/+ (GF)	Hml>/+ (SF)
		1	0	2	0	0	0	0	0	0	0	0	1	0	2	0	2	0	0	0	1	0	4	0	0	1	0	13	0	0
		2	0	0	0	0	0	0	0	0	0	0	2	0	0	0	0	0	0	0	0	0	4	0	0	2	0	7	11	4
		3	0	1	0	0	0	0	0	0	0	1	3	0	0	0	0	0	0	1	9	0	3	0	0	3	0	1	0	0
		4	0	1	0	0	0	0	0	0	0	1	4	0	0	0	0	0	0	0	0	0	4	0	1	4	0	2	2	19
		5	1	0	0	0	0	0	0	0	1	0	5	0	4	0	0	0	0	0	0	3	2	1	0	5	0	8	8	4
		6	0	0	0	0	2	3	0	0	0	0	6	0	3	0	6	0	0	0	3	0	0	0	0	6	0	13	12	1
		7	0	0	2	0	1	2	0	1	0	0	7	0	3	0	14	0	0	1	2	1	0	0	0	7	0	16	3	8
		8	0	0	1	1	0	0	3	1	0	0	8	0	4	1	0	1	0	0	0	0	0	0	0	8	0	2	20	26
		9	0	0	0	0	0	0	0	0	0	0	9	0	4	0	0	3	0	0	0	1	0	0	0	9	0	12	2	3
		10	0	0	0	0	0	0	0	0	0	1	10	0	3	0	9	0	0	0	3	0	0	0	1	10		1	6	0
		11	1	0	0	0	0	0	0	0	0	0	11	0	2	0	1	0		0	0	0		0	0	11		2	0	13
		12	0	0	0	0	0	0	0	0	1	0	12	1	2	0	5	0			0	0		1	0	12			0	33
		13	0	0							0	0	13	1	0		0	0			0	2		0	0	13			0	34
		14	0	0							0	0	14	0	6		1	0			0	0			0	14			4	9
		15	1	0							1	0	15	1	0		0	0			2	0			0	15			0	0
		16											16	0	2		0	0			0	0				16			6	0
		17											17	0	0		0				0	9				17			0	5
		18											18	0	0		3				0	0				18			0	0
		19											19	0	0		2				3	2				19			0	4
		20											20	0	2		4				4					20			3	1
		21											21	0	0		4				0					21			24	17
		22											22	0	2		3				0					22			1	27
		23											23	0	3		2				0					23			0	4
		24											24	0			6				0					24			0	0
		25											25	0			3									25			0
		26											26	0			12									26			1
		27											27	0			8									27
		28											28	0			2									28
		29											29				0									29
		30											30				12									30
		31											31				10									31
		32											32													32
