# Supplementary material for: Metabolic control of cellular immune-competency by odors in Drosophila
Source: eLife journal article supplement (doi:10.7554/elife.60376), 2020-12-29
Supplement: supp [file elife_poa_e60376_Supplementary_file_2_source_data_1.xlsx]

## Sheet: Supplementary Table 2
	Supplementary Table 2. Blood cell counts and lamellocytes count (per mm2) in circulation from un-infected wandering 3rd instar larvae.
	Control (W1118)	Orco1/Orco1	Orco>+	Orco>Hid	Or42a>+	Or42a>Hid	Or49a>+	Or49a>Hid	GH146>/+	GH146>ChATRNAi	Kurs6/+	Kurs6/Gad1RNAi		dome-MESO-GFP>/+	dome-MESO-GFP>GABABR1RNAi	dome-MESO-GFP>GatRNAi	dome-MESO-GFP>Gat	dome-MESO-GFP>SsadhRNAi	dome-MESO-GFP>αKDHRNAi	dome-MESO-GFP>skapRNAi	dome-MESO-GFP>SdhARNAi	dome-MESO-GFP>Hph	dome-MESO-GFP>HphRNAi	dome-MESO-GFP>simaRNAi	dome-MESO-GFP>LdhRNAi	HmlD>/+ (RF)	HmlD>/+ (WOF)
	Total no. of cells per 1 square mm2	Total no. of cells per 1 square mm2	Total no. of cells per 1 square mm2	Total no. of cells per 1 square mm2	Total no. of cells per 1 square mm2	Total no. of cells per 1 square mm2	Total no. of cells per 1 square mm2	Total no. of cells per 1 square mm2	Total no. of cells per 1 square mm2	Total no. of cells per 1 square mm2	Total no. of cells per 1 square mm2	Total no. of cells per 1 square mm2		Total no. of cells per 1 square mm2	Total no. of cells per 1 square mm2	Total no. of cells per 1 square mm2	Total no. of cells per 1 square mm2	Total no. of cells per 1 square mm2	Total no. of cells per 1 square mm2	Total no. of cells per 1 square mm2	Total no. of cells per 1 square mm2	Total no. of cells per 1 square mm2	Total no. of cells per 1 square mm2	Total no. of cells per 1 square mm2	Total no. of cells per 1 square mm2	Total no. of cells per 1 square mm2	Total no. of cells per 1 square mm2
1	460	350	534	342	212	620	432	410	279.385	551.747	294	430	1	496.338	330.112	289.53	416.737	613.789	496.728	462.781	242.316	419.858	475.657	384.35	708.218	470	561
2	368	365	570	534	356	460	368	274	245.047	560.721	311	388	2	315.674	246.218	218.514	552.917	460.829	404.64	437.027	238.804	446.782	194.711	329.331	471.755	427	709
3	527	331	476	323	473	468	435	560	264.557	307.09	404	161	3	284.848	188.078	216.563	263.387	727.728	365.62	545.113	188.858	404.64	548.235	310.211	830.742	416	594
4	288	471	368	543	460	356	322	280	346.11	388.252	549	436	4	213.831	223.196	398.787	215.002	538.09	339.476	376.546	289.14	463.951	336.745	294.993	288.36	501	523
5	435	407	568	650	510	256	250	427	227.488	305.919	395	524	5	312.552	267.289	223.976	138.132	538.48	294.993	309.431	257.924	188.078	441.71	360.938	477.218	367	425
6	537	527	344	346	260	543	368	490	357.816	300.846	467	487	6	295.384	178.713	304.358		542.382	291.481	430.394	256.753	335.574	352.353	358.987	376.936
7	418	422	257	345	370	324	328	340			466	521	7	275.093	211.1	325.819		361.328	385.911	339.476	269.24	189.639	446.392	383.179
8	468	412	563	360	457		404	534			348	315	8	211.1	239.975	442.88			256.753	387.081	388.642	142.424	234.902	435.857
9				480
	lamellocytes per 1 square mm2	lamellocytes per 1 square mm2	lamellocytes per 1 square mm2	lamellocytes per 1 square mm2	lamellocytes per 1 square mm2	lamellocytes per 1 square mm2	lamellocytes per 1 square mm2	lamellocytes per 1 square mm2	lamellocytes per 1 square mm2	lamellocytes per 1 square mm2	lamellocytes per 1 square mm2	lamellocytes per 1 square mm2		lamellocytes per 1 square mm2	lamellocytes per 1 square mm2	lamellocytes per 1 square mm2	lamellocytes per 1 square mm2	lamellocytes per 1 square mm2	lamellocytes per 1 square mm2	lamellocytes per 1 square mm2	lamellocytes per 1 square mm2	lamellocytes per 1 square mm2	lamellocytes per 1 square mm2	lamellocytes per 1 square mm2	lamellocytes per 1 square mm2	lamellocytes per 1 square mm2	lamellocytes per 1 square mm2
1	0	0	0	0	0	0	0	0	0	0.390203	0	0	1	0	1.17061	0	5.07264	0	0.390203	0	0	0	0	0	0	0	2
2	0	0	0	0	0	0	0	0	0	2.34122	0	0	2	0	2.73142	0	14.4375	0	0	0	0	0	0	0	0	0	11
3	0	0	0	0	0	0	0	0	0	1.17061	0	0	3	0	5.07264	0	0	0.390203	2.34122	0.390203	0.780406	0	0	0.780406	0	0	14
4	0	0	0	0	0	0	0	0	0.390203	0	0	0	4	0	1.17061	0	0	2.73142	0.780406	1.95101	0.390203	0	0	0	0	0	6
5	0	0	0	0	0	0	0	0	0.390203	0.390203	0	0	5	0	0.780406	0	0.780406	1.17061	1.95101	0	0.390203	0	1.56081	0.390203	0	0	1
6	0	0	0	0	0	0	0	0	0	0	0	0	6	0	1.17061	0		1.95101	1.56081	2.34122	1.95101	0	1.17061	1.17061	0	0	1
7	0	0	0	0	0	0	0	0			0	0	7	0	1.56081	0.780406		0.390203	1.95101	0.390203	0.390203	0	0	0
8	0	0	0	0	0		0	0			0	0	8	0.780406	5.07264	0.780406			0.390203	7.80406	1.17061	0.390203	0.390203	0
9				0
