# Supplementary material for: Metabolic control of cellular immune-competency by odors in Drosophila
Source: eLife journal article supplement (doi:10.7554/elife.60376), 2020-12-29
Supplement: supp [file elife_poa_e60376_Supplementary_file_3_source_data_1.xlsx]

## Sheet: Supplementary File 3
		Supplementary File 3. Lymph gland area quantifications.
		dome-MESO>/+							dome-MESO>/+				dome-MESO>/+ (RF)
		%Pxn+ area	%Dome+ %Pxn+ area	%Dome+ area		dome-MESO>/+ (RF) %Pxn+ area	dome-MESO>/+ (SF) %Pxn+ area		%Pxn+ area	%Dome+ %Pxn+ area	%Dome+ area		%Dome+ area+	% non Dome P1 area
	1	53.5351	3.00873	43.4562	1	34.6137	17.6202	1	35.2734	5.04668	59.6799	1	56.5919	31.179
	2	30.6925	5.59241	63.7151	2	16.771	19.6874	2	32.7879	9.57772	57.6344	2	61.2028	24.0961
	3	29.7001	0.52406	69.7758	3	13.3537	18.6227	3	34.149	5.27482	60.5762	3	70.7512	15.9618
	4	31.1343	1.91931	66.9464	4	15.7829	18.8102	4	27.2226	0.370792	72.4066	4	61.2269	22.1116
	5	33.8605	2.73698	63.4025	5	13.5811	17.1889	5	26.5815	1.58476	71.8338	5	55.4647	34.2923
	6	32.8087	16.202	50.9892	6	20.6876	19.4512	6	17.9636	7.8375	74.1989	6	53.009	33.2551
	7	24.8628	1.7304	73.4068	7	13.2646	13.8045		dome-MESO>simaRNAi			7	56.9583	33.5991
	8	20.0702	2.44659	77.4832	8	25.1501	18.3359		%Pxn+ area	%Dome+ %Pxn+ area	%Dome+ area	8	58.1132	29.9339
		dome-MESO>Gat RNAi			9	19.8207	14.88	1	51.5924	-2.64086	51.0485	9	62.2031	23.2991
		%Pxn+ area	%Dome+ %Pxn+ area	%Dome+ area	10	22.4977	24.6562	2	29.1163	19.7738	51.1099	10	67.8294	21.7596
	1	36.8773	17.2095	45.9132	11	14.551	32.1435	3	37.9385	25.5314	36.5301		dome-MESO>/+ (WOF)
	2	32.383	14.216	53.4011	12	30.7684		4	41.1685	5.84329	52.9882		%Dome+ area+	% non Dome P1 area
	3	38.0913	18.3443	43.5643	13	22.6482		5	34.634	15.917	49.449	1	84.6207	6.04279
	4	32.4505	20.1222	47.4273	14	12.7362		6	37.4363	14.558	48.0057	2	83.6119	3.19748
	5	30.5858	13.4308	55.9834	15	32.109		7	34.1313	19.6082	46.2605	3	72.502	12.5554
	6	26.0676	21.4186	52.5138				8	41.2339	10.6738	48.0923	4	73.8623	17.6436
	7	34.6139	13.773	51.6131				9	32.7655	9.93203	57.3025	5	69.6988	12.8289
		dome-MESO>SsadhRNAi						10	41.6957	17.9597	40.3445	6	67.1735	17.9575
		%Pxn+ area	%Dome+ %Pxn+ area	%Dome+ area				11	38.7725	18.2675	42.96	7	69.1052	19.3207
								12	47.7117	13.2052	39.0831	8	67.1719	24.0399
	1	35.7732	21.3855	42.8412				13	51.5961	11.6184	36.7856
	2	36.827	40.8772	22.2958				14	39.6137	26.8933	33.493
	3	47.2703	24.0539	28.6759				15	40.2668	9.18558	50.5476
	4	42.0539	31.4724	26.4737
	5	40.1261	26.8339	33.0401
	6	34.7739	7.50198	57.7241
	7	36.5842	33.1826	30.2332
	8	37.584	20.5749	41.8412
	9	25.8349	22.2427	51.9224
	10	19.2397	45.6484	35.1118
	11	35.9206	29.9914	34.088
