# Supplementary material for: Metabolic control of cellular immune-competency by odors in Drosophila
Source: eLife journal article supplement (doi:10.7554/elife.60376), 2020-12-29
Supplement: supp [file elife_poa_e60376_Supplementary_file_4_source_data_1.xlsx]

## Sheet: Supplementary File 4
		Supplementary File 4. Hemolymph GABA measurement.
		Or49a>/+ (RF)	Or49a>/+ (WOF)	Or49a>Hid, rpr (WOF)	Or49a>Hid, rpr (RF)		Hml>/+ (RF)	Hml>/+ (WOF)		Hml>/+ (RF)	Hml>/+ (Acetic acid)	Hml>/+ (1-octen-3-ol)	Hml>/+ (Acetophenone)
	1	42.9	103.068	99.434	29.0633	1	8.928	61.118	1	9.26209	1.54747	4.9811	3.79417
	2	67.74	83.714	70.618	30.4033	2	6.04	40.902	2	6.16042	2.7785	4.71043	2.3113
	3	69.12	86.396	66.576	23.6133	3	7.834	50.322	3		1.3195	5.45167	3.83248
	4	77.6433	81.62	47.652	69.8967
	5	66.14	131.162	53.314	65.0833
	6	44.6567	117.538	44.55	65.3433
	7	18.5667			84.85
	8	16.2233			80.92
	9	10.7033			97.7767
