# Supplementary material for: Metabolic control of cellular immune-competency by odors in Drosophila
Source: eLife journal article supplement (doi:10.7554/elife.60376), 2020-12-29
Supplement: supp [file elife_poa_e60376_Supplementary_file_5_source_data_1.xlsx]

## Sheet: Supplementary File 5
	Supplementary File 5. Crystal cell counts in lymph gland.
	w1118	orco1/orco1	Orco>/+	Orco>Hid, rpr	Or42a>/+	Or42a>Hid	Kurs6>/+	Kurs6>Gad1RNAi	GH146>/+	GH146>ChATRNAi		dome-MESO>/+	dome-MESO>GatRNAi	dome-MESO>SsadhRNAi	dome-MESO>simaRNAi	dome-MESO>Gat(ov)		Hml△>GFP/+( RF)	Hml△>GFP/+(WOF)
1	8	34	55	68	44	22	89	184	7	24	1	71	75	57	29	11	1	34	63
2	12	49	36	75	27	38	92	141	14	23	2	67	30	60	37	188	2	32	20
3	35	11	80	73	32	45	102	135	6	21	3	22	42	62	13	225	3	18	18
4	5	44	99	91	24	42	110	226	25	25	4	8	20	36	4	40	4	7	48
5	7	8	39	94	13	37	115	195	18	50	5	46	4	30	15	70	5	102	28
6	9	8	85	95	14	12	230	69	48	15	6	67	54	32	38	27	6	34	48
7	1	8	60	148	44	13	129	72	115		7	88	39	34	63	57	7	16	73
8	15	11	105	74	35	9	150	65	26		8	29	54	62	29	70	8	51	51
9	26	68	23	89		30	117		21		9	19	21	37	16	20	9	37	63
10	45	47	60	47			182		10		10	19	15	23	38	24	10		30
11	56	56	105	156			260		11		11	30	14	65	36	130	11		25
12		110		157					95		12	12	10	9	54	160	12
13		38		64					100		13	31	24	35	25	23	13
14		15							17		14	61	27		49	56	14
15									22		15	41	45		27	68
16									21		16	44	92		47	60
17									23		17	46	103		25	57
18											18	27	35			120
19											19	101	37			62
20											20	73	28			49
21											21	78	38			120
22											22	153	60			95
23											23	76	19			157
24											24	40	60			120
25											25	53	59			210
26											26	30	63			52
27											27	65	17			56
28											28	22	13			48
29											29	70	48
30											30	75	53
31											31	74	62
32											32	97	55
33											33	83
34											34	79
35											35	80
36											36	30
37											37	53
38											38	63
39											39	38
40											40	29
41											41	58
42											42	37
43											43	38
44											44	40
45											45	24
46											46	27
47											47	43

## Sheet: Sheet1
		w1118	19.9 ± 18.14 (11)
		orco1/orco1	36.2 ± 29.5 (14)
		Or42a>/+	29 ± 12 (8)
		Or42a>Hid, rpr	27.6 ± 14 (9)
		Orco>/+	68 ± 28.8 (11)
		Orco>Hid, rpr	94.7 ± 36.2 (13)
		Kurs6>/+	143 ± 57.2 (11)
		Kurs6>Gad1RNAi	135.9 ± 62.7 (8)
		GH146>/+	34 ± 33.56 (17)
		GH146>ChATRNAi	26 ± 11.07 (6)
		domeMESO>GFP>/+	52.3 ± 28 (47)
		domeMESO>GFP>GatRNAi	41 ± 23.8 (32)
		domeMESO>GFP>SsadhRNAi	41.7 ± 17.7 (13)
		domeMESO>GFP>simaRNAi	32.1 ± 15.6 (17)
		domeMESO>GFP>Gat	84.8 ± 59 (28)
		Hml△>GFP/+ (RF)	36.8 27.8 (9)
		Hml△>GFP/+ (WOF)	42.5 ± 19.2 (11)
